# Supplementary material for: Blink Synchronized Brain Activation: Association With Ascending Arousal Network
Source: Research Square preprint supplement (doi:10.21203/rs.3.rs-93881/v1), 2020-10-28

**SUPPLEMENTARY DATA 5**

**BLINK DENSITY DURING FEEDBACK**

Blink densities at the FEEDBACK stimulus for Null (No Incentive), Gain/Earn and Lose situations. “0s” is where the WIN/LOSE feedback slide was shown. Feedback related blink densities for the GO trials are shown on the left, and for the NOGO trials are shown on the right.


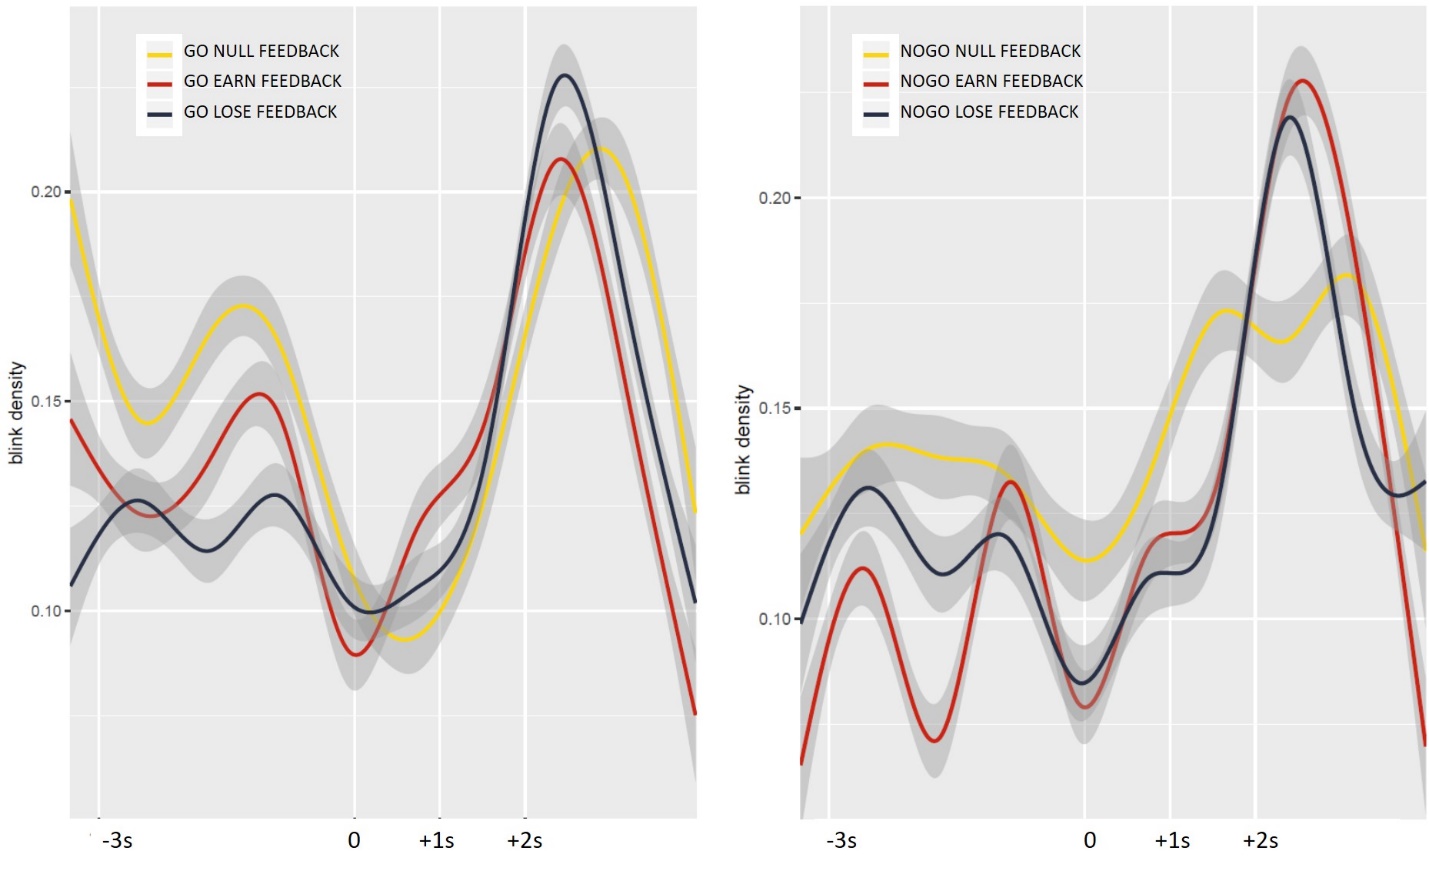

Supplement: Supplementary file 1 [file ced7fe05072d47cf49b698b5.docx]
