# Supplementary material for: Blink Synchronized Brain Activation: Association With Ascending Arousal Network
Source: Research Square preprint supplement (doi:10.21203/rs.3.rs-93881/v1), 2020-10-28

**Supplementary Data 1**

**Cluster corrected Task-Blink correlations**

Voxels above or below absolute t-value of 3.54 are shown. Cluster corrected voxels are marked with a thick borderline.

**TASK 2TR BEFORE BLINK**

**
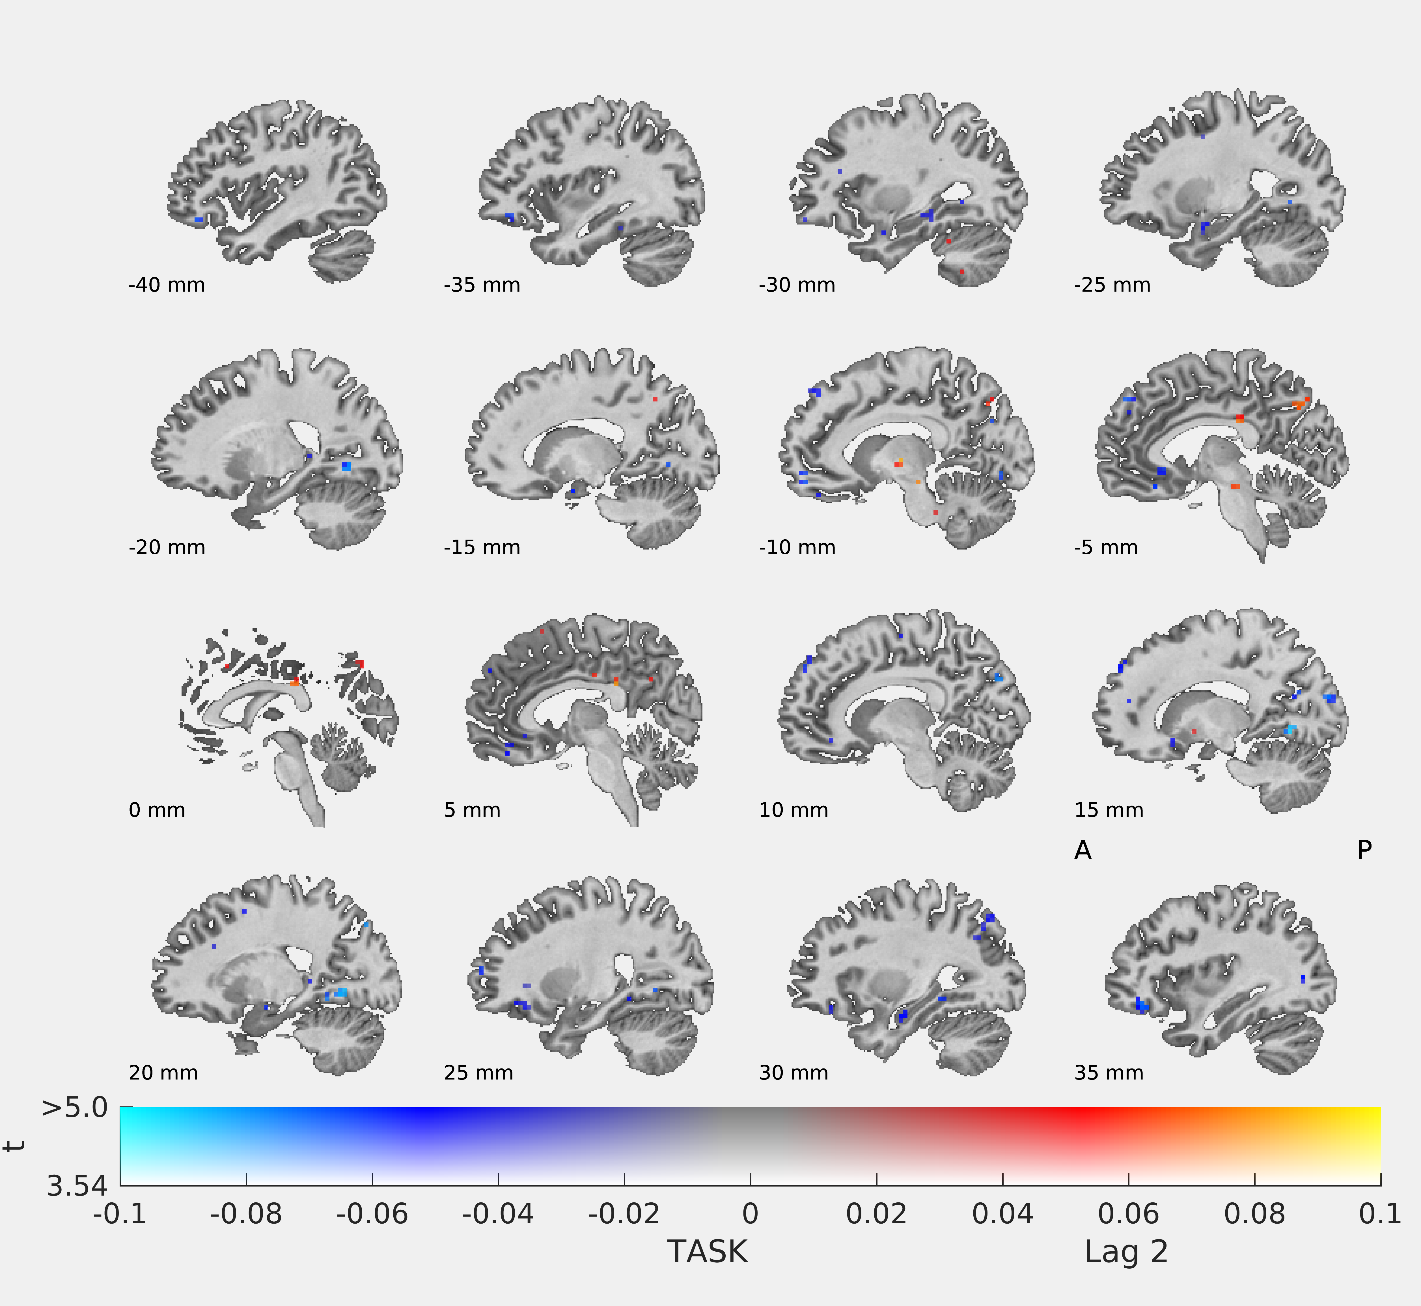
**

**1TR BEFORE BLINK**

**
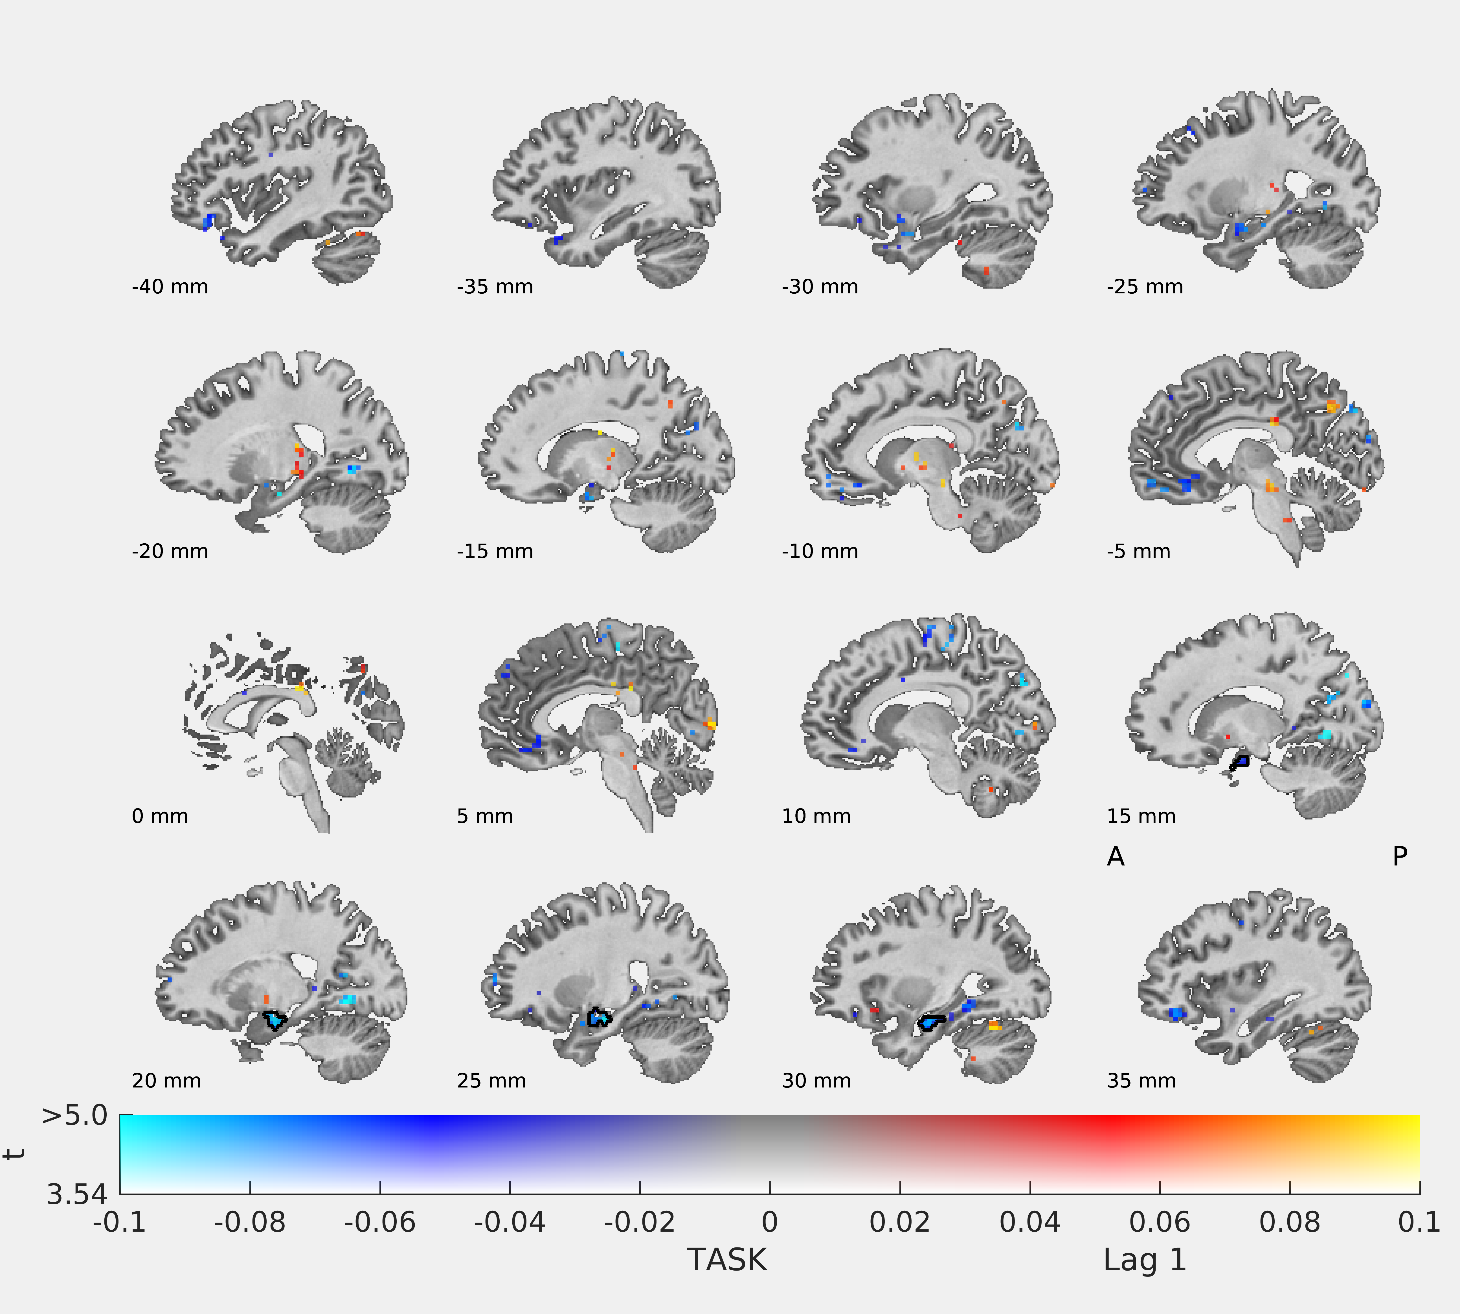
**

**AT BLINK**


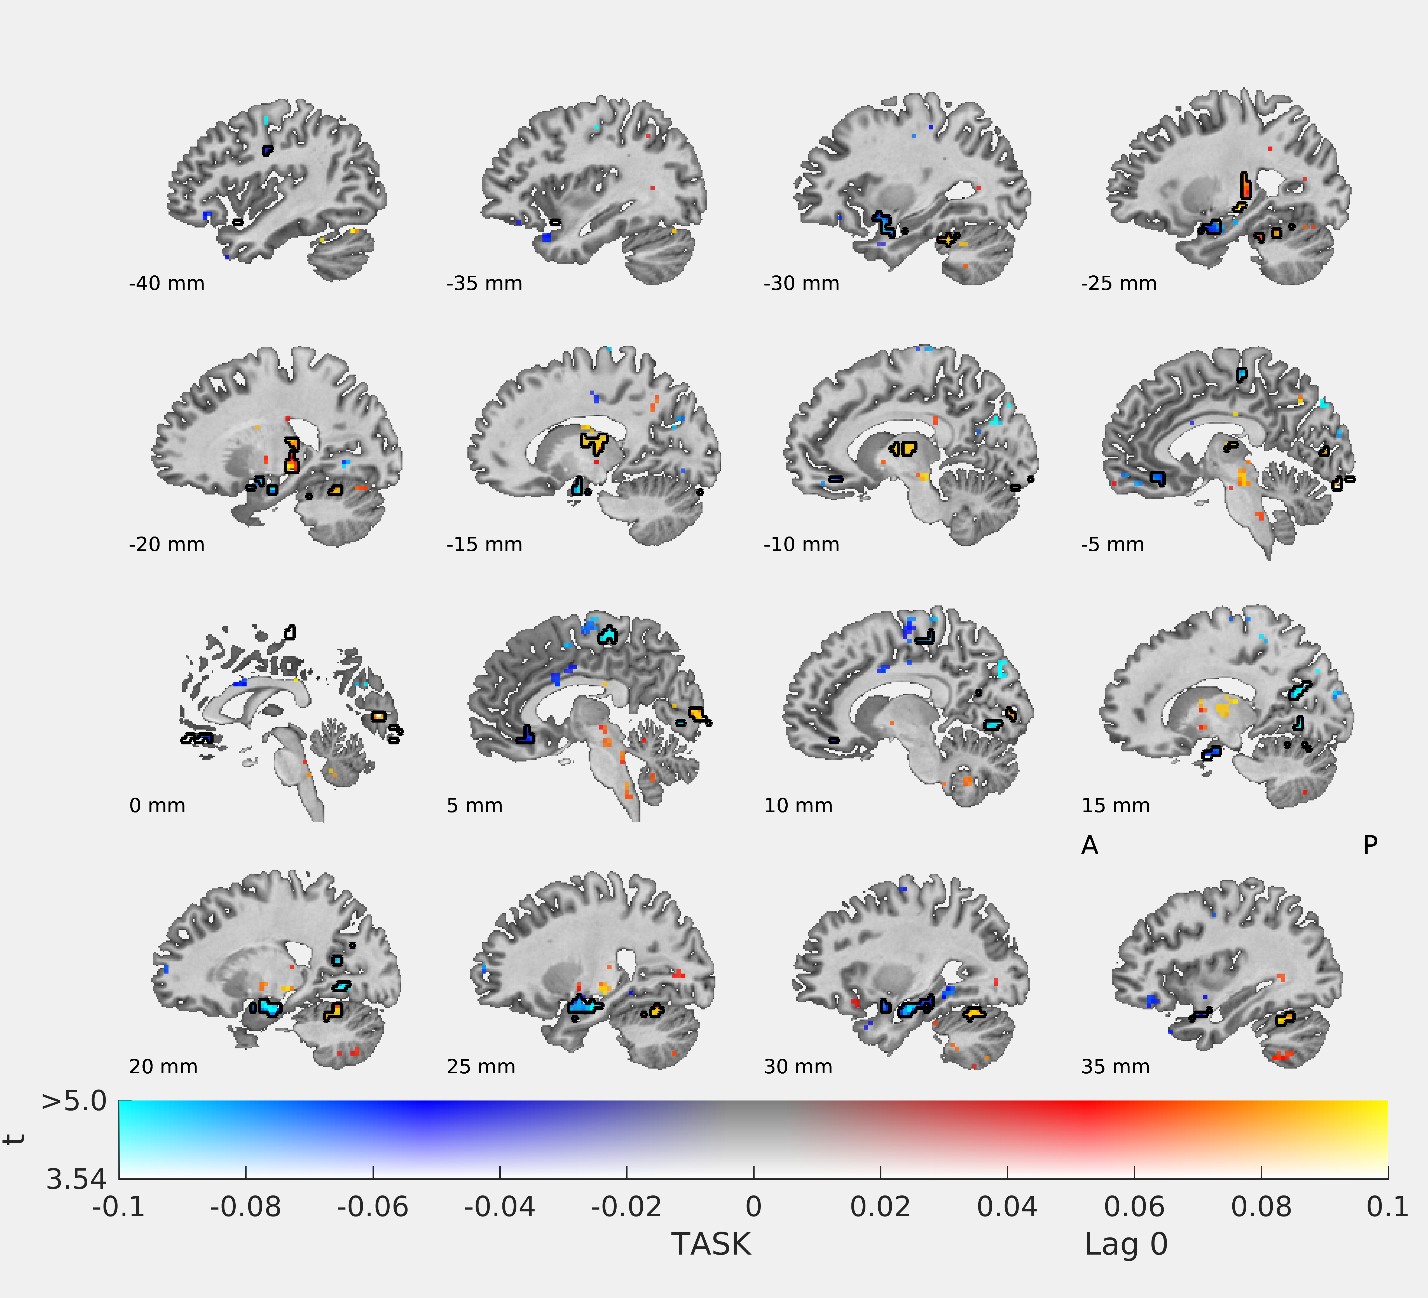


**1TR AFTER BLINK**


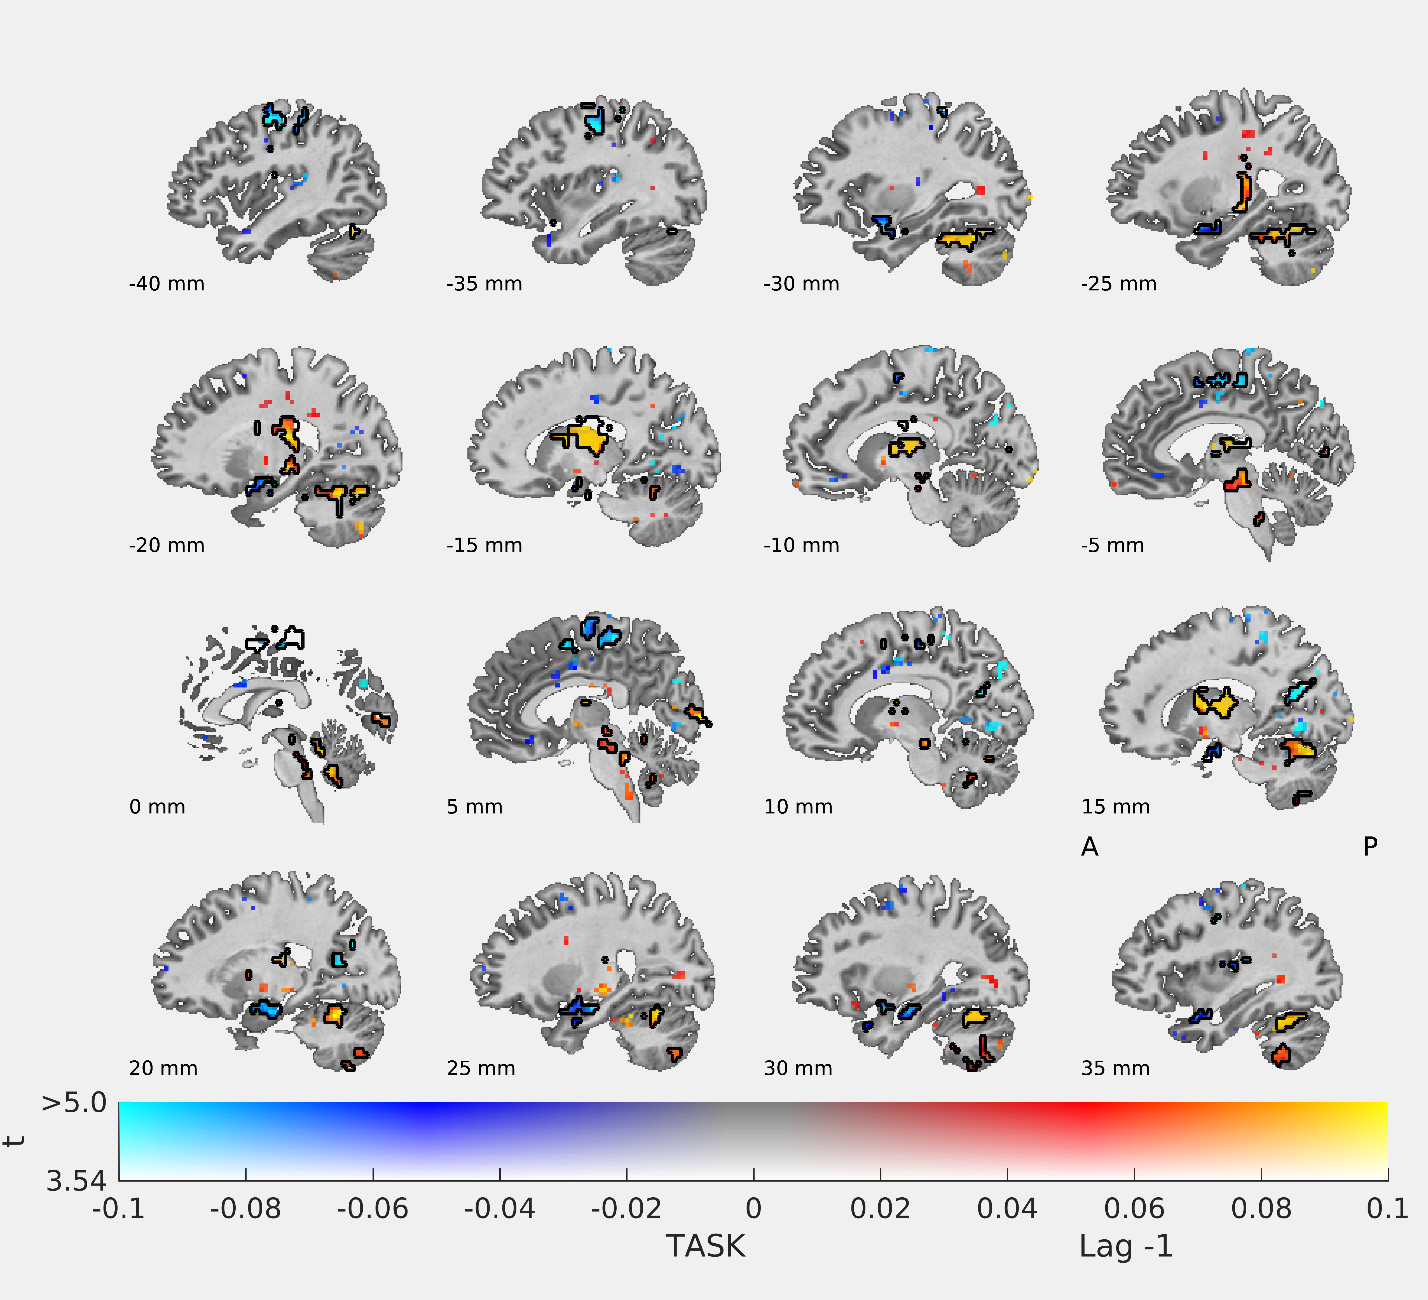


**2TR AFTER BLINK**


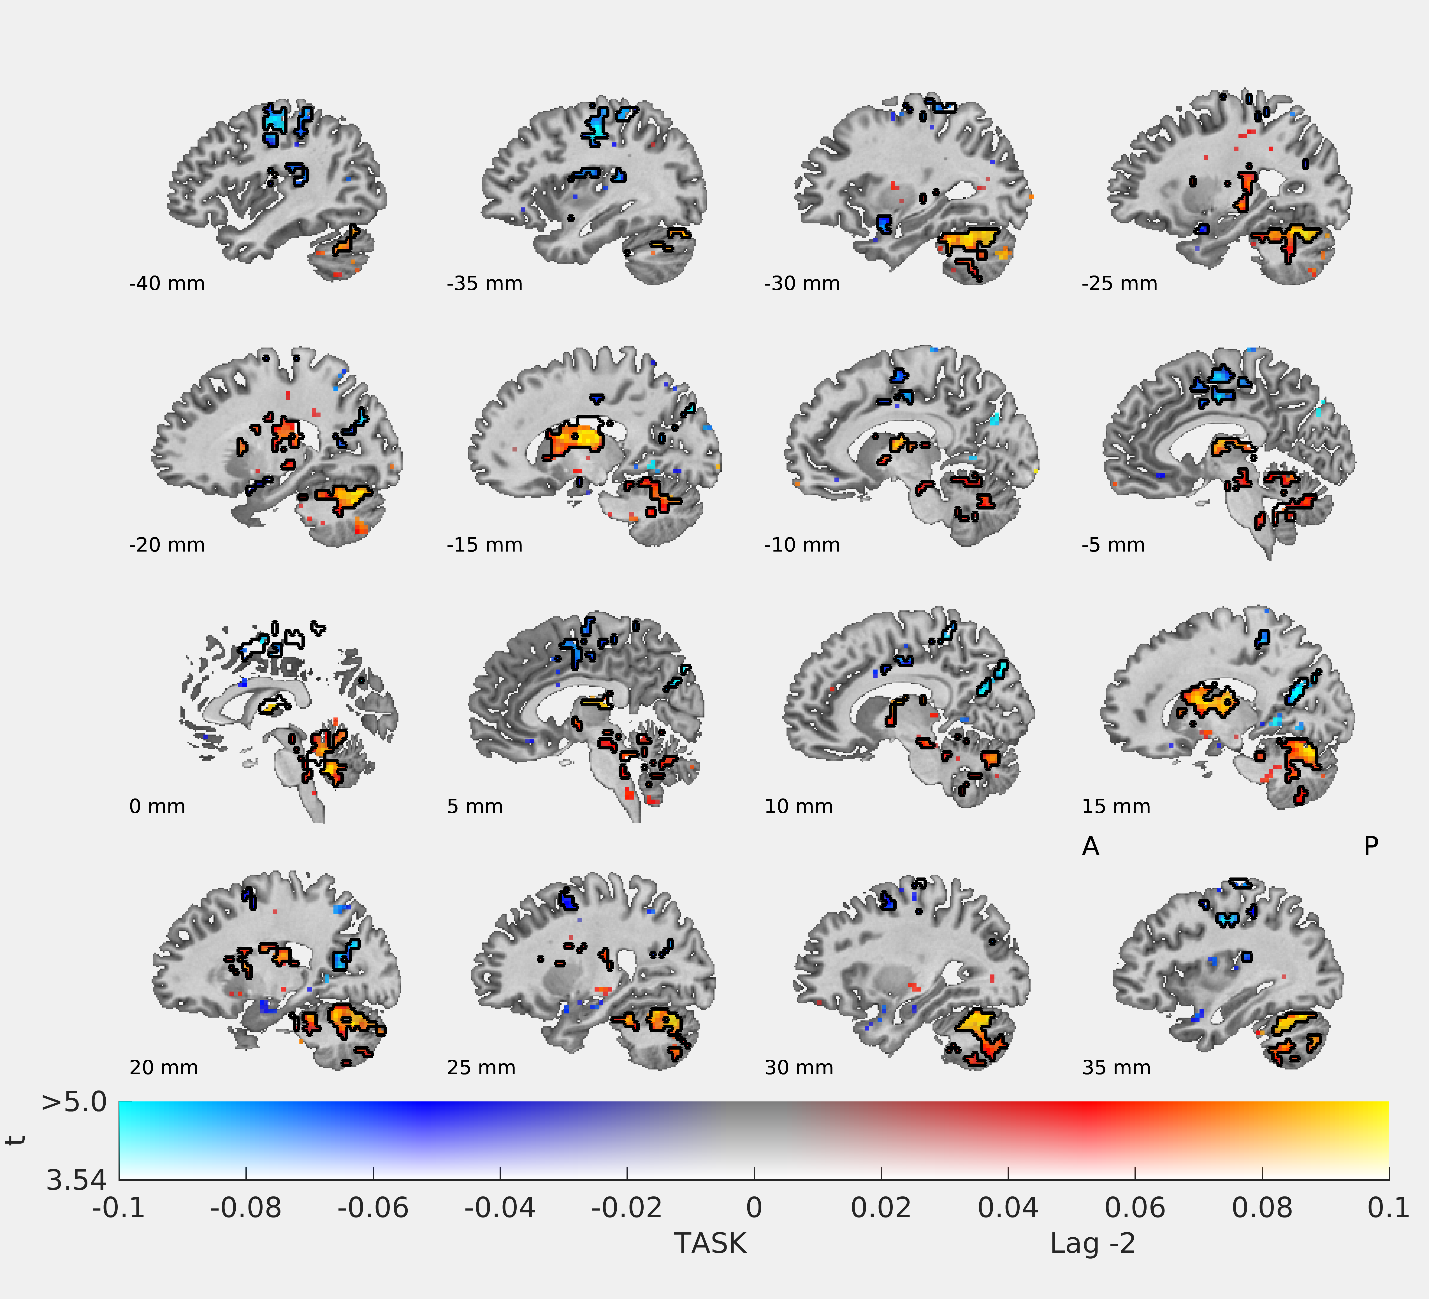

Supplement: Supplementary file 2 [file 28ba414b31b98ce2a912ead7.docx]
