# Supplementary material for: Blink Synchronized Brain Activation: Association With Ascending Arousal Network
Source: Research Square preprint supplement (doi:10.21203/rs.3.rs-93881/v1), 2020-10-28

**Supplementary Data 7**

AAN across-subject variability plots. Each point represent a value of an individual. Task and Rest shown in different rows.


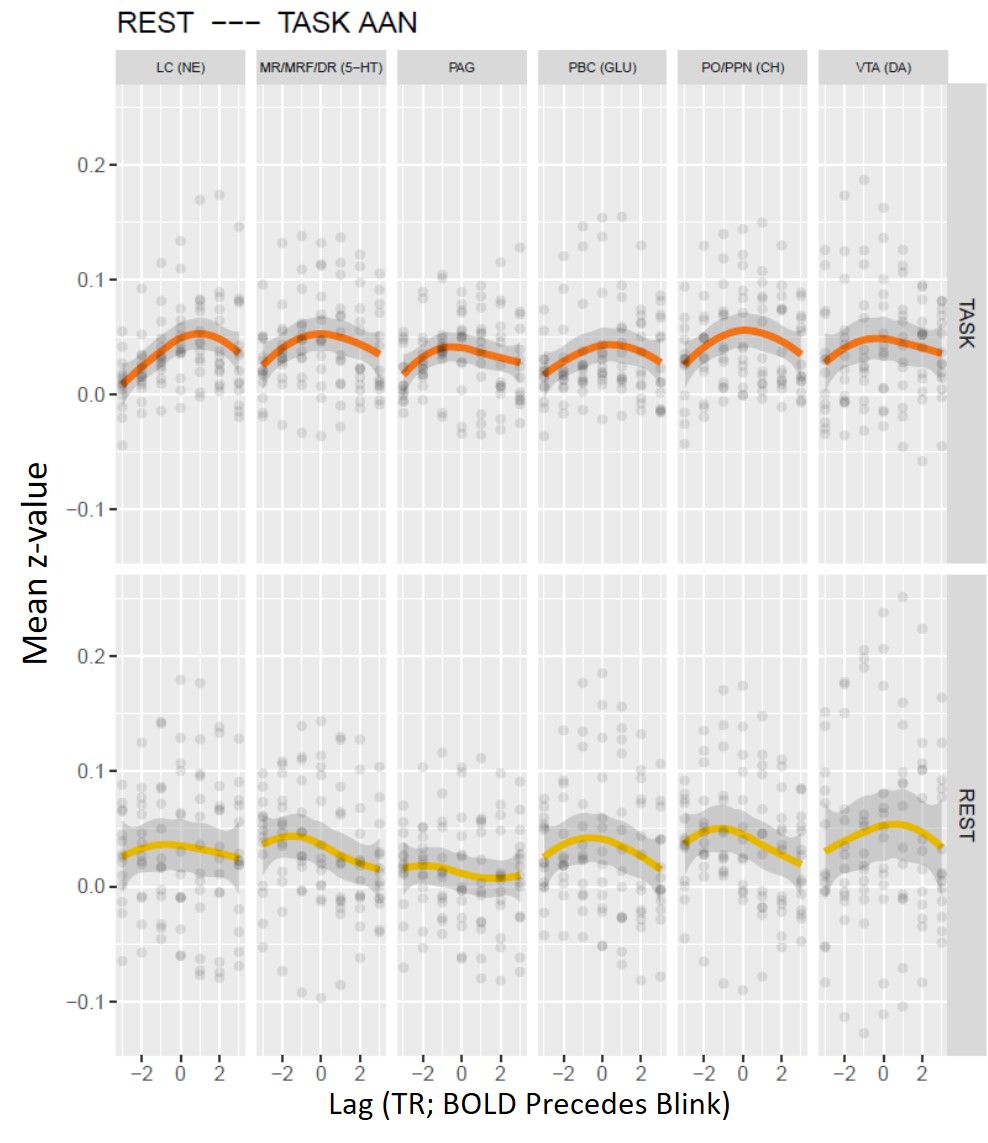


Thalamus across-subject variability


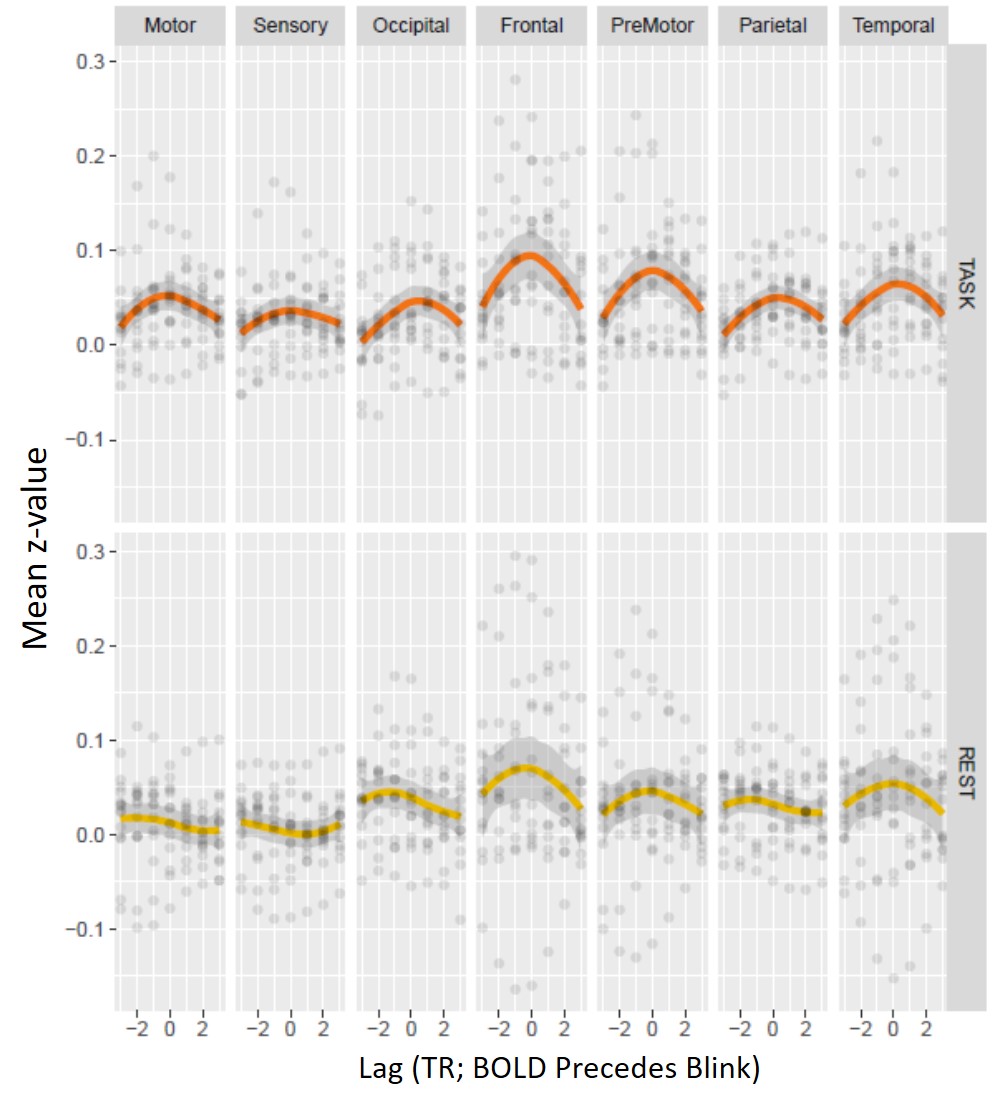


Cerebellum across-subject variability


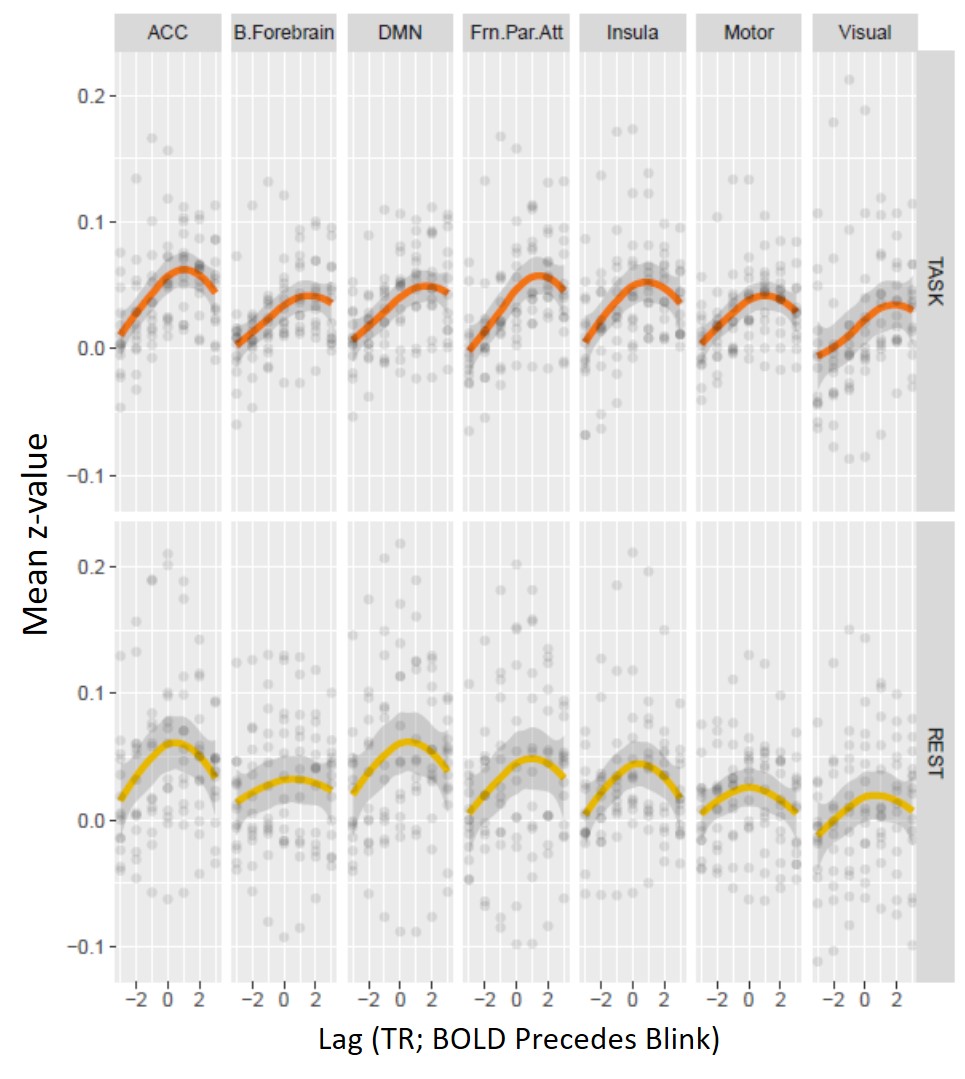

Supplement: Supplementary file 4 [file 581029def4b49a62e281ab71.docx]
