# Supplementary material for: Blink Synchronized Brain Activation: Association With Ascending Arousal Network
Source: Research Square preprint supplement (doi:10.21203/rs.3.rs-93881/v1), 2020-10-28
Supplement: Supplementary file 7 [file 9c9b5e90c30fe8c1d5c12384.docx]

**Supplementary Table 1**

Subregions of the Buckner cerebellar atlas collapsed to yield 7 main networks.

See Buckner et al. (2011) for the region labels and distribution of the cerebellar areas.

| TARGET CORTICAL REGION | Fronto-Parietal-Attention | DMN | Motor | Basal Forebrain | Visual | Insula | ACC |
| --- | --- | --- | --- | --- | --- | --- | --- |
| Cerebellum Sources collapsed | 5, 12, 13,17 | 11, 16 | 3, 6 | 9,10 | 1,2 | 4 | 7,8 |
