# Supplementary material for: Blink Synchronized Brain Activation: Association With Ascending Arousal Network
Source: Research Square preprint supplement (doi:10.21203/rs.3.rs-93881/v1), 2020-10-28
Supplement: Supplementary file 10 [file ef3b79f22c60a9951dabc329.docx]

**Supplementary Data 8**

Flattened visual cortical map of the blink activity at blink moment for Rest and Task. Cross-hair shown in the top figure is located over MNI position at x=12, y=-98, z=0. The second figure is produced via a cut through the calcarine sulcus. As can be seen in the figures, blink-related activity is evident mainly in Rest, and partially in Task through the calcarine sulcus and the primary visual field.

***
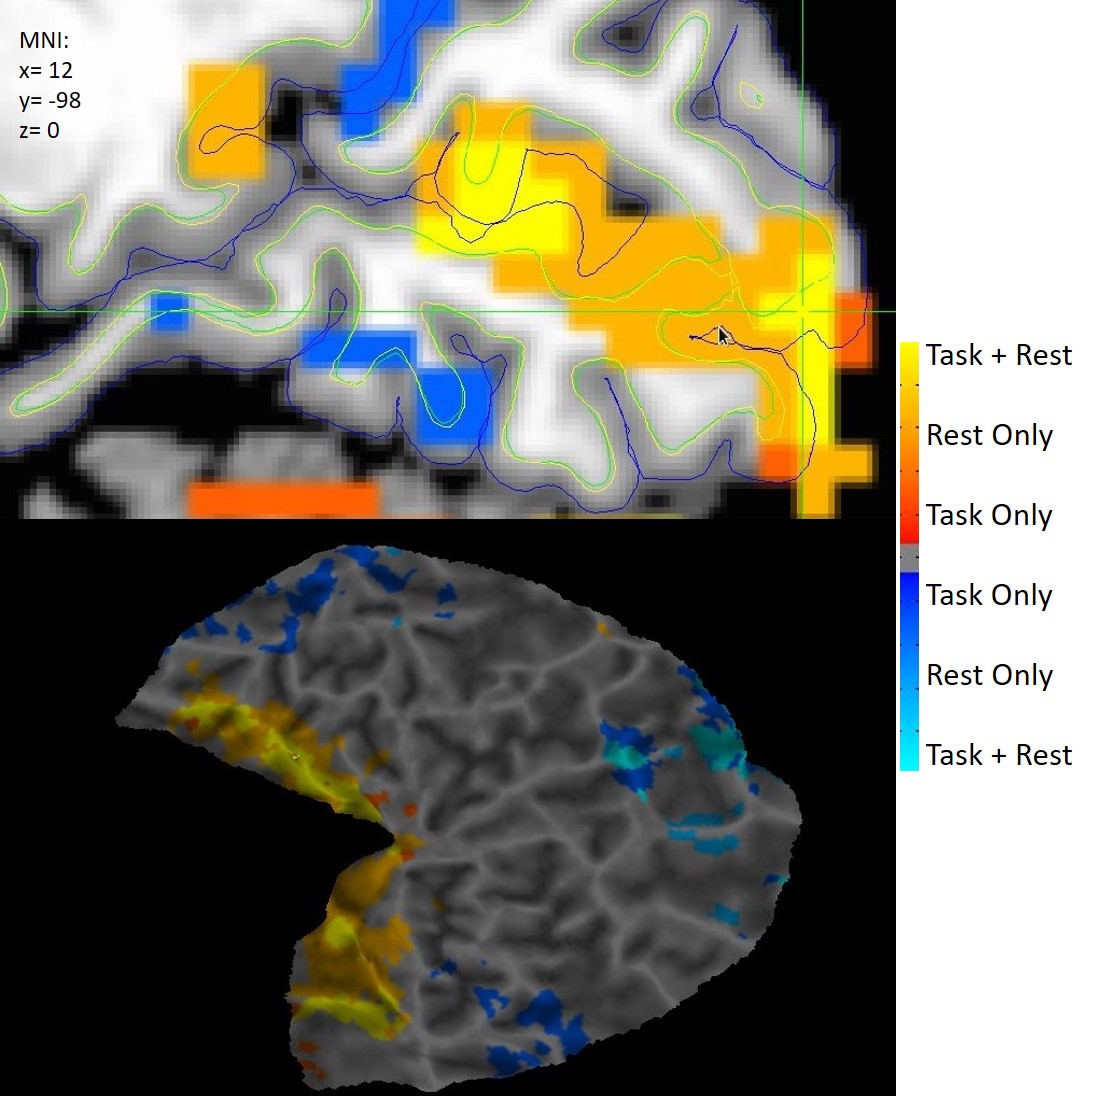
***
