# Supplementary material for: Blink Synchronized Brain Activation: Association With Ascending Arousal Network
Source: Research Square preprint supplement (doi:10.21203/rs.3.rs-93881/v1), 2020-10-28
Supplement: Supplementary file 11 [file 48d8b6a42c6485ac197de177.docx]

**Supplementary Data 2**

**Cluster corrected Rest-Blink correlations**

Voxels above or below absolute t-value of 3.54 are shown. Cluster corrected voxels are marked with a thick borderline.

**REST 2TR BEFORE BLINK**

**
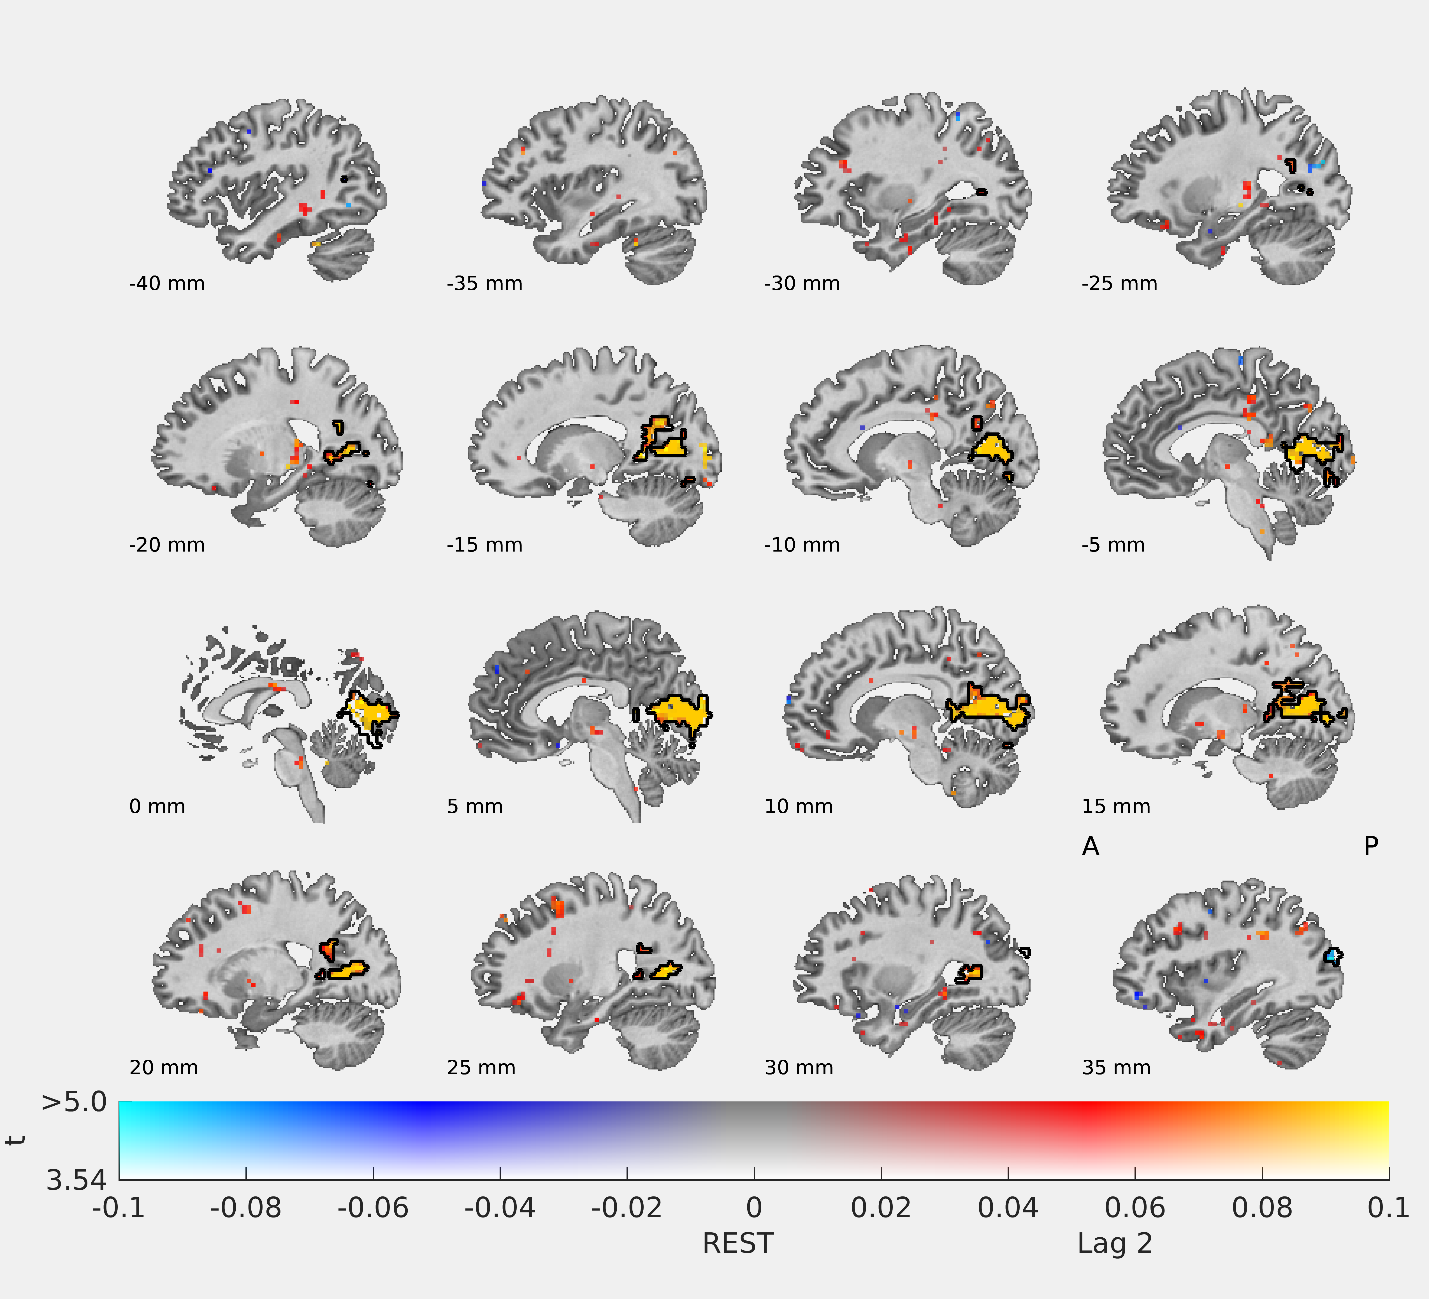
**

**REST 1TR BEFORE BLINK**

**
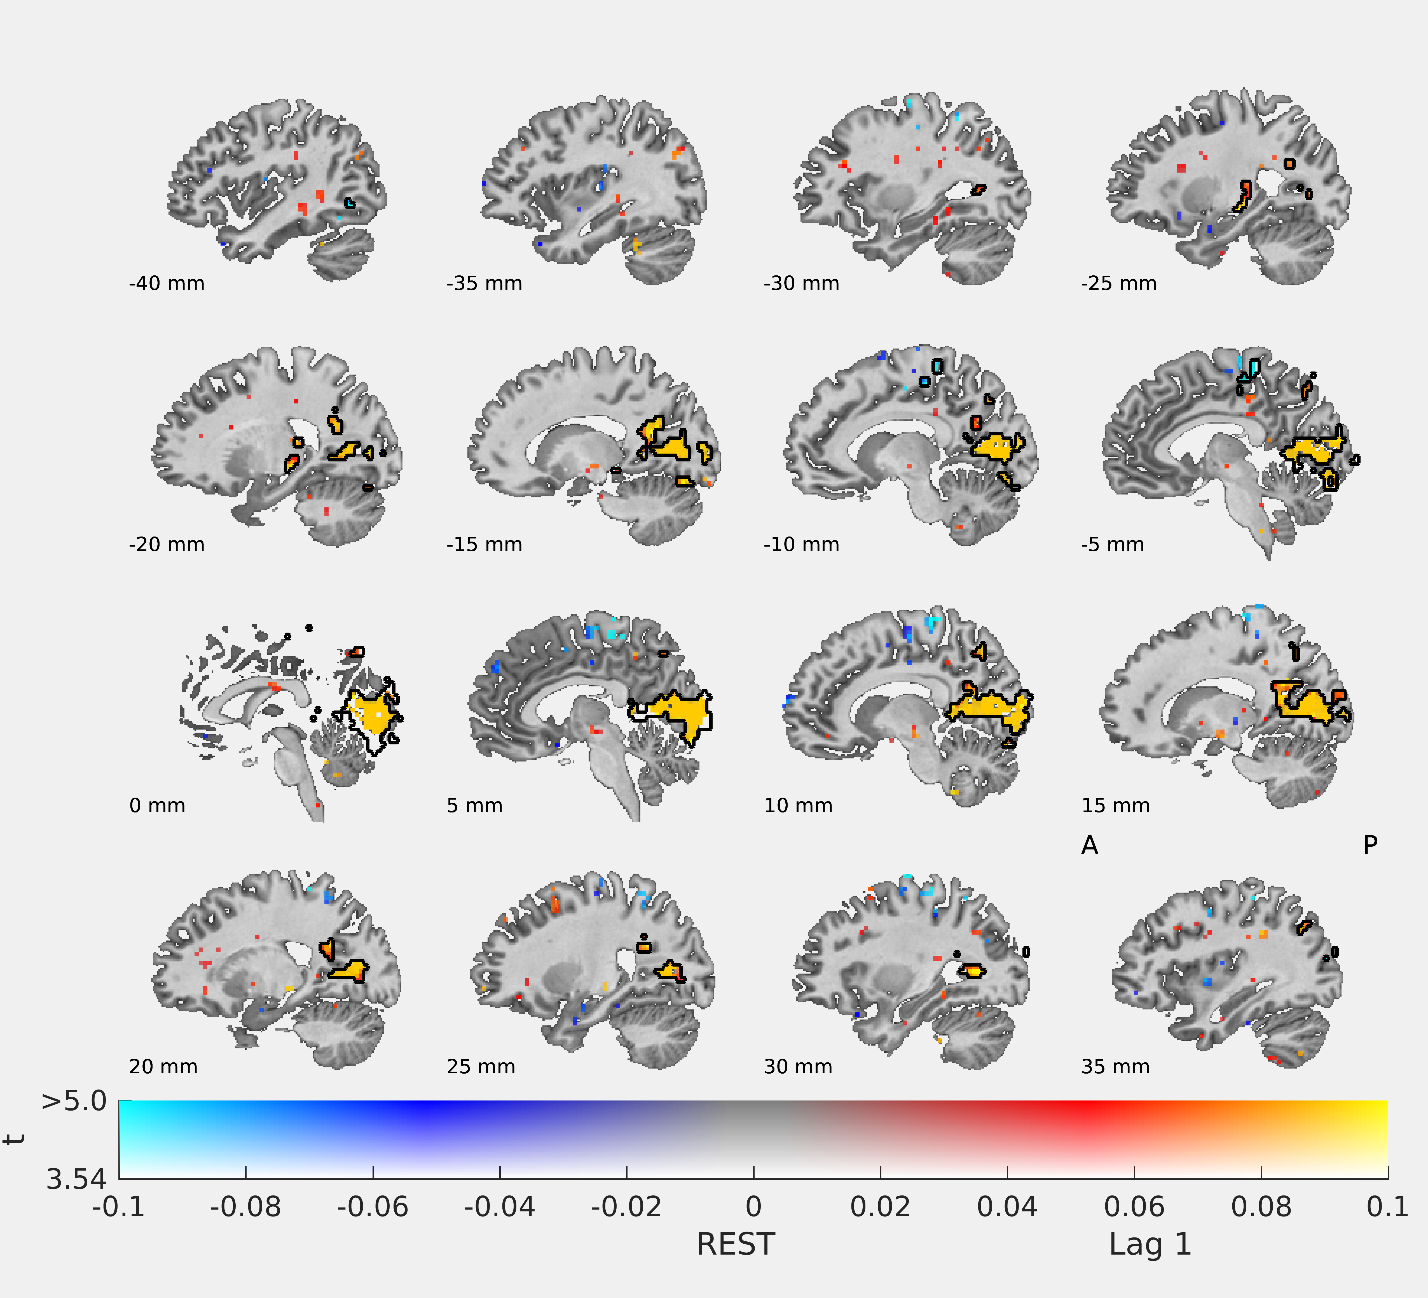
**

**AT BLINK**

**
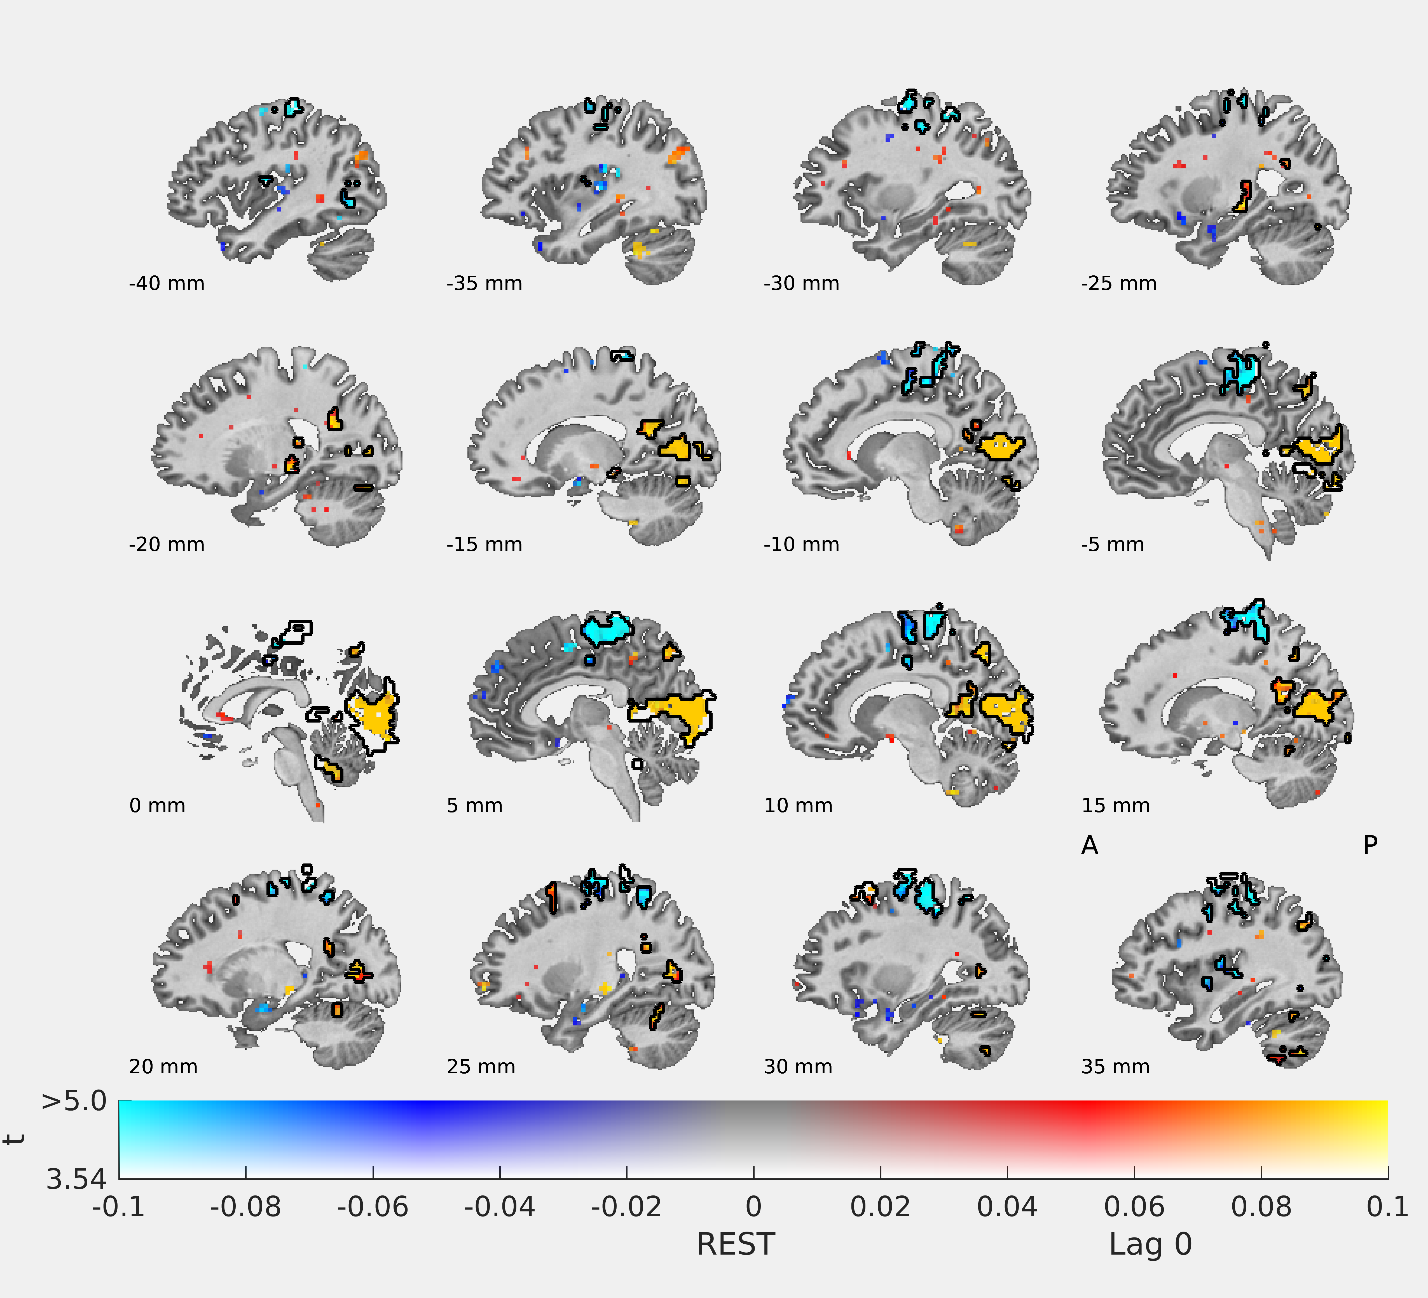
**

**REST 1TR AFTER BLINK**

**
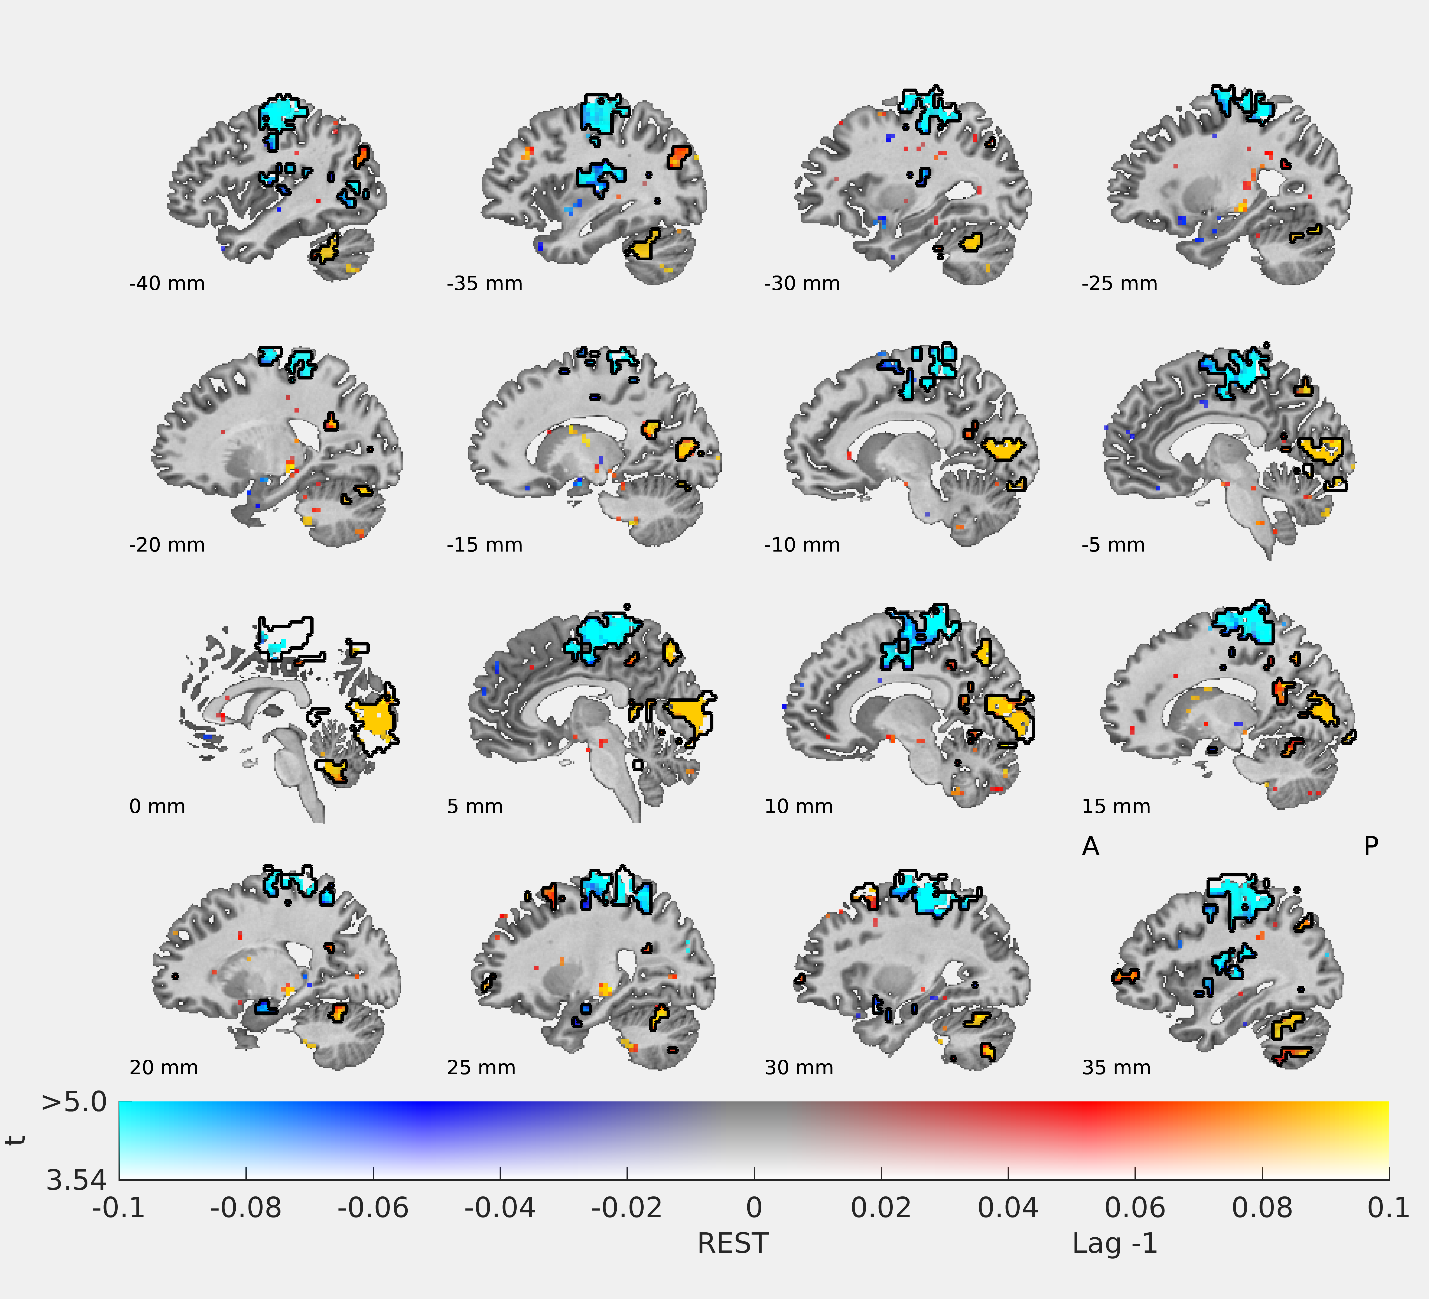
**

**REST 2TR AFTER BLINK**

**
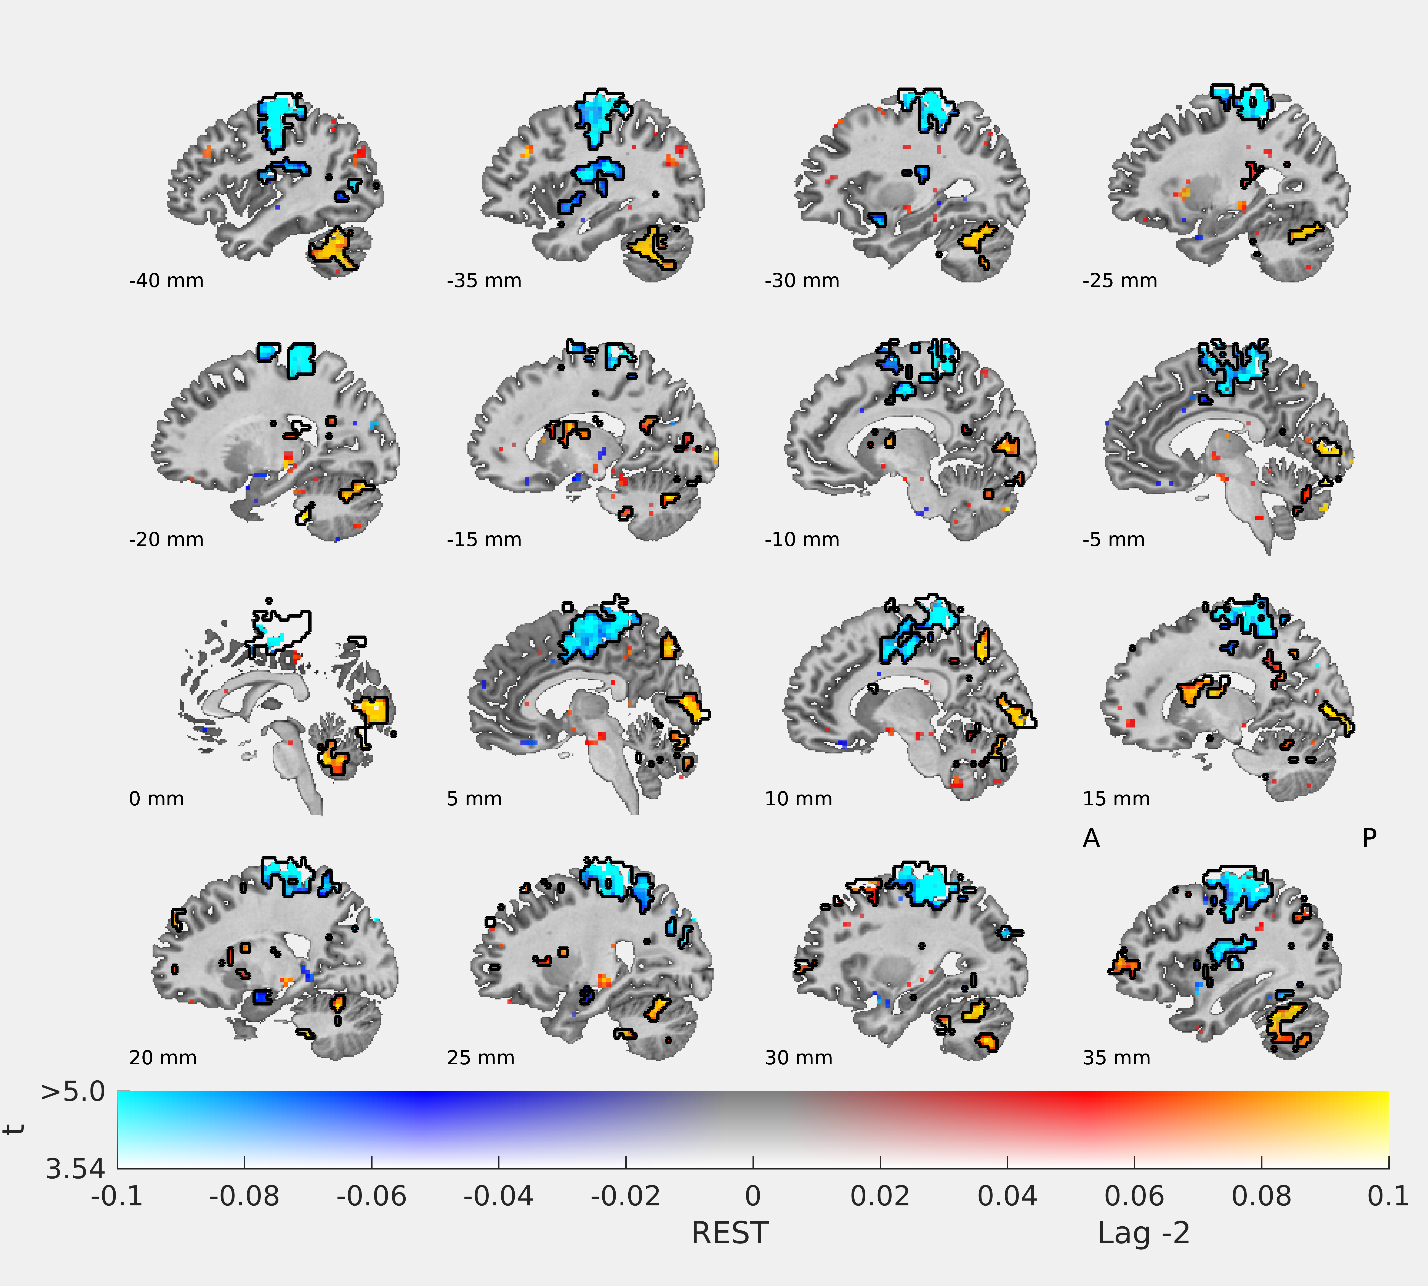
**
