# Supplementary material for: Blink Synchronized Brain Activation: Association With Ascending Arousal Network
Source: Research Square preprint supplement (doi:10.21203/rs.3.rs-93881/v1), 2020-10-28
Supplement: Supplementary file 12 [file 74fe1ed1254c1d89b962b98e.docx]

**Supplementary Data 4**

**Task, Rest, and Rest-Task FWER corrected clusters summarized in tables.**

**Table 1.** TASK time-lagged correlation clusters surviving cluster-threshold (k=30, p<0.002, pFWER-clus < 0.05). Clusters in each lag from -2TR to +2TR are shown in separate boxes. Yellow rows represent clusters with negative correlations and grey rows represent clusters with positive correlations. Clusters in each positive and negative lag are sorted by their t-values, from most negative to most positive. Maximum absolute t-value voxel locations (in MNI coordinates) are given in columns X, Y, and Z. To ease finding and viewing cluster locations, a link to “neurosynth” webpage is provided.

| **Lag** | **#Voxels** | **Mean abs (t)** | **Max Int (t)** | **X** | **Y** | **Z** | **Location** | **pFWE-corr** | **Neurosynth** |
| --- | --- | --- | --- | --- | --- | --- | --- | --- | --- |
|  |  |  |  |  |  |  |  |  |  |
| -2 | NA | NA | NA | NA | NA | NA | NA | NA | NA |
|  |  |  |  |  |  |  |  |  |  |
| -1 | 61 | 4.19 | -6.53 | 24 | -10 | -15 | R Amygdala/  R Parahippocampus | 0.002 | <https://neurosynth.org/locations/?x=24&y=-10&z=-16> |
|  |  |  |  |  |  |  |  |  |  |
| 0 | 134 | 4.31 | -7.54 | 60 | 2 | -6 | R Temporal/BA22 | <.001 | <https://neurosynth.org/locations/60_2_-6_6/> |
| 0 | 117 | 4.37 | -7.01 | 24 | -7 | -15 | R Amygdala/R Hippocampus | <.001 | <https://neurosynth.org/locations/?x=24&y=-8&z=-16> |
| 0 | 94 | 3.98 | -6.42 | -45 | -7 | 33 | Motor | <.001 | <https://neurosynth.org/locations/?x=-44&y=-8&z=32> |
| 0 | 100 | 4.04 | -6.35 | 60 | 8 | 39 | R Eye field/Oculomotor/ R Precentral | <.001 | <https://neurosynth.org/locations/?x=60&y=8&z=40> |
| 0 | 75 | 4.12 | -5.85 | -33 | -1 | -15 | L Amygdala/Parahippocampal | <.001 | <https://neurosynth.org/locations/?x=-32&y=0&z=-16> |
| 0 | 46 | 4.12 | -5.54 | -60 | -4 | -3 | L Temporal/Auditory/BA22 | 0.01 | <https://neurosynth.org/locations/?x=-60&y=-4&z=-4> |
| 0 | 41 | 4.08 | -5.29 | 0 | -25 | 57 | R Primary Motor/ Frontal Gyrus | 0.019 | <https://neurosynth.org/locations/?x=0&y=-24&z=8> |
| 0 | 44 | 4.02 | -5.23 | -9 | 35 | -15 | L Medial/Inferior Frontal | 0.013 | <https://neurosynth.org/locations/?x=-8&y=36&z=-16> |
| 0 | 34 | 4.05 | 5.52 | -24 | -37 | -27 | L Cerebellum IV, V, Culmen | 0.048 | <https://neurosynth.org/locations/-24_-36_-28_6/> |
| 0 | 62 | 4.21 | 6.03 | 6 | -88 | 3 | R Primary Visual, BA17 | 0.001 | <https://neurosynth.org/locations/?x=6&y=-88&z=4> |
| 0 | 91 | 4.16 | 6.65 | -21 | -28 | 0 | L Pulvinar/ Genicular Body | <.001 | <https://neurosynth.org/locations/?x=-20&y=-28&z=0> |
| 0 | 72 | 4.21 | 7.04 | 30 | -61 | -21 | R Cerebellum VI, Declive | <.001 | <https://neurosynth.org/locations/?x=30&y=-60&z=-20> |
|  |  |  |  |  |  |  |  |  |  |
| 1 | 607 | 4.30 | -9.39 | 60 | 2 | -6 | R STG, BA22 | <.001 | <https://neurosynth.org/locations/60_2_-6_6/> |
| 1 | 608 | 4.23 | -8.50 | -60 | -4 | -3 | L STG, BA22 | <.001 | <https://neurosynth.org/locations/?x=-60&y=-4&z=-4> |
| 1 | 115 | 4.43 | -7.08 | 27 | 2 | -21 | R Amygdala/ Parahippocampal | <.001 | <https://neurosynth.org/locations/?x=28&y=2&z=-20> |
| 1 | 153 | 4.21 | -6.75 | 0 | -1 | 51 | Cingulate Gyrus/Premotor Region | <.001 | <https://neurosynth.org/locations/?x=0&y=0&z=52> |
| 1 | 55 | 4.32 | -6.70 | 15 | -64 | 18 | R Calcarine Gyrus/Precuneus | 0.002 | <https://neurosynth.org/locations/?x=16&y=-64&z=18> |
| 1 | 79 | 4.39 | -6.52 | -30 | 2 | -15 | L Amygdala/Parahippocampal | <.001 | <https://neurosynth.org/locations/?x=-30&y=2&z=-16> |
| 1 | 36 | 4.08 | 5.05 | 6 | -88 | 3 | R Primary Visual/Cuneus/BA17 | 0.025 | <https://neurosynth.org/locations/?x=6&y=-88&z=4> |
| 1 | 44 | 4.04 | 5.11 | 15 | -70 | -51 | R Cerebellum VIII | 0.008 | <https://neurosynth.org/locations/?x=16&y=-70&z=-52> |
| 1 | 97 | 4.16 | 6.43 | -3 | -40 | -39 | L Cerebellar Vermis/Cerebellum | <.001 | <https://neurosynth.org/locations/-4_-40_-40_6/> |
| 1 | 142 | 4.16 | 7.18 | -24 | -37 | -27 | L Cerebellum IV, V/Culmen | <.001 | <https://neurosynth.org/locations/?x=-24&y=-36&z=-28> |
| 1 | 44 | 4.28 | 7.22 | 36 | -49 | -54 | R Cerebellum VIII | 0.008 | <https://neurosynth.org/locations/?x=36&y=-48&z=-54> |
| 1 | 350 | 4.20 | 7.24 | -18 | -19 | 9 | L Thalamus/Ventral Posterior Lateral Nucleus | <.001 | <https://neurosynth.org/locations/?x=-18&y=-20&z=8> |
| 1 | 188 | 4.36 | 8.32 | 30 | -61 | -21 | R Cerebellum VI | <.001 | <https://neurosynth.org/locations/?x=30&y=-60&z=-20> |
|  |  |  |  |  |  |  |  |  |  |
| 2 | 812 | 4.34 | -9.92 | 66 | -10 | 27 | R Precentral Gyrus | <.001 | <https://neurosynth.org/locations/66_8_28_6/> |
| 2 | 893 | 4.44 | -8.31 | -60 | -13 | 36 | L Precentral Gyrus | <.001 | <https://neurosynth.org/locations/?x=-60&y=-12&z=36> |
| 2 | 247 | 4.10 | -8.21 | -15 | -19 | 42 | L Cingulate gyrus/Frontal eye field/BA24 | <.001 | <https://neurosynth.org/locations/?x=-16&y=-20&z=42> |
| 2 | 112 | 4.36 | -7.85 | 18 | -61 | 18 | R PCC/Secondary Visual Area | <.001 | <https://neurosynth.org/locations/?x=18&y=-60&z=18> |
| 2 | 44 | 4.69 | -7.24 | -30 | 2 | -15 | L Parahippocampal/Amygdala | 0.004 | <https://neurosynth.org/locations/?x=-30&y=2&z=-16> |
| 2 | 43 | 4.42 | -6.05 | 24 | 5 | 57 | R SFG/BA6 | 0.005 | <https://neurosynth.org/locations/?x=24&y=4&z=56> |
| 2 | 45 | 4.20 | -5.75 | -45 | -79 | 6 | L Middle Occipital Gyrus/MT/V5 | 0.004 | <https://neurosynth.org/locations/?x=-44&y=-80&z=6> |
| 2 | 37 | 4.09 | -5.07 | 12 | -43 | 60 | R Precuneus/Paracentral Lobule | 0.012 | <https://neurosynth.org/locations/?x=12&y=-72&z=60> |
| 2 | 39 | 3.96 | -4.74 | -18 | -73 | 24 | L Superior Occipital Gyrus | 0.009 | <https://neurosynth.org/locations/?x=-18&y=-72&z=24> |
| 2 | 607 | 4.31 | 7.32 | -18 | -19 | 9 | L Thalamus/Ventral Posterior Lateral Nucleus | <.001 | <https://neurosynth.org/locations/?x=-18&y=-20&z=8> |
| 2 | 1281 | 4.30 | 11.24 | 18 | -61 | -21 | R Cerebellum VI | <.001 | <https://neurosynth.org/locations/?x=18&y=-60&z=-20> |

**Table 2.** REST time-lagged correlation clusters surviving cluster-threshold (k=30, extend threshold p<0.002, pFWER-clus < 0.05). Clusters in each lag from -2TR to +2TR are shown in separate boxes. Yellow rows represent clusters with negative correlations and grey rows represent clusters with positive correlations. Clusters in each positive and negative sections are sorted by their t values, most negative to most positive. Maximum absolute t-value voxel locations (in MNI coordinates) are given in columns X, Y, and Z. To ease finding and viewing cluster locations, a link to “neurosynth” webpage is provided.

| **Lag** | **#Voxels** | **Mean abs (t)** | **Max Int (t)** | **X** | **Y** | **Z** | **Location** | **pFWE-corr** | **Neurosynth** |
| --- | --- | --- | --- | --- | --- | --- | --- | --- | --- |
|  |  |  |  |  |  |  |  |  |  |
| -2 | 66 | 4.70 | -9.39 | -45 | 38 | -3 | L Middle Orbitofrontal Gyrus | 0.001 | <https://neurosynth.org/locations/?x=-4&y=38&z=-4> |
| -2 | 98 | 4.28 | -7.60 | 48 | -76 | 6 | R Middle Occipital Parietal Gyrus | <.001 | <https://neurosynth.org/locations/48_-76_6_6/> |
| -2 | 56 | 4.23 | -6.05 | -57 | -67 | 18 | L Middle Temporo Parital Gyrus | 0.002 | <https://neurosynth.org/locations/?x=-56&y=-68&z=18> |
| -2 | 985 | 4.80 | 12.19 | 15 | -73 | 15 | R Primary Visual Cortex/Calcarine Gyrus | <.001 | <https://neurosynth.org/locations/?x=16&y=-72&z=16> |
|  |  |  |  |  |  |  |  |  |  |
| -1 | 218 | 4.41 | -9.71 | 48 | -76 | 6 | R Middle Occipital | <.001 | <https://neurosynth.org/locations/48_-76_6_6/> |
| -1 | 53 | 4.21 | -7.31 | -45 | 41 | -3 | L Middle Frontal Gyrus/BA47 | 0.005 | <https://neurosynth.org/locations/?x=-44&y=40&z=-4> |
| -1 | 200 | 4.18 | -7.19 | -57 | -67 | 18 | L Middle Occipital Parietal Gyrus | <.001 | <https://neurosynth.org/locations/?x=-56&y=-68&z=18> |
| -1 | 35 | 4.29 | -5.80 | 57 | 35 | -3 | R IFG | 0.045 | <https://neurosynth.org/locations/?x=56&y=36&z=-4> |
| -1 | 49 | 4.29 | 5.42 | 39 | -76 | 45 | R Posterior Superior temporal sulcus | 0.007 | <https://neurosynth.org/locations/?x=40&y=-76&z=44> |
| -1 | 53 | 3.99 | 5.57 | 3 | -76 | 48 | R Precuneus/Retrosplenial | 0.005 | <https://neurosynth.org/locations/?x=4&y=-76&z=48> |
| -1 | 1274 | 5.11 | 13.49 | 6 | -85 | 0 | R Primary Visual/BA17 | <.001 | <https://neurosynth.org/locations/?x=6&y=-84&z=0> |
|  |  |  |  |  |  |  |  |  |  |
| 0 | 281 | 4.54 | -9.51 | 42 | -91 | 15 | R Middle Occipital/BA19 | <.001 | <https://neurosynth.org/locations/?x=42&y=-92&z=16> |
| 0 | 1018 | 4.25 | -7.72 | 45 | -1 | 33 | R IFG/Premotor eye field | <.001 | <https://neurosynth.org/locations/?x=44&y=0&z=32> |
| 0 | 378 | 4.29 | -7.70 | -66 | -55 | 30 | L Supramarginal Gyrus/BA40 | <.001 | <https://neurosynth.org/locations/?x=-66&y=-56&z=30> |
| 0 | 66 | 4.32 | -7.13 | 39 | -13 | 9 | R Insula | 0.001 | <https://neurosynth.org/locations/?x=40&y=-12&z=8> |
| 0 | 245 | 4.01 | -6.95 | -27 | -16 | 63 | L Precentral Gyrus / BA6 | <.001 | <https://neurosynth.org/locations/?x=-28&y=-16&z=64> |
| 0 | 59 | 4.11 | -6.30 | 48 | -31 | 15 | R STG | 0.002 | <https://neurosynth.org/locations/?x=48&y=-32&z=16> |
| 0 | 38 | 4.38 | -6.03 | -48 | -7 | 3 | L STG/BA22 | 0.028 | <https://neurosynth.org/locations/?x=-48&y=-8&z=4> |
| 0 | 44 | 3.90 | -5.95 | 57 | -37 | 12 | R STG/BA41 | 0.013 | <https://neurosynth.org/locations/?x=56&y=-36&z=12> |
| 0 | 39 | 4.05 | -5.84 | -48 | 23 | -15 | L IFG | 0.025 | <https://neurosynth.org/locations/?x=-48&y=24&z=-16> |
| 0 | 38 | 4.25 | -5.83 | 27 | -52 | 54 | R Inferior Parietal Lobule/ BA7 | 0.028 | <https://neurosynth.org/locations/?x=28&y=-52&z=54> |
| 0 | 49 | 4.01 | 4.99 | 21 | -58 | -18 | R Cerebellum VI | 0.007 | <https://neurosynth.org/locations/?x=20&y=-58&z=-18> |
| 0 | 35 | 4.16 | 5.54 | 3 | -46 | -30 | R Cerebellum Vermis, X | 0.042 | <https://neurosynth.org/locations/?x=4&y=-46&z=-30> |
| 0 | 70 | 4.24 | 5.83 | 9 | -67 | 48 | R Precuneus / Retrosplenial | 0.001 | <https://neurosynth.org/locations/?x=8&y=-68&z=48> |
| 0 | 72 | 4.37 | 6.03 | 51 | -73 | 33 | R Angular Gyrus/BA39 | <.001 | <https://neurosynth.org/locations/?x=52&y=-72&z=32> |
| 0 | 35 | 4.38 | 6.43 | -21 | -28 | -6 | L Parahippocampal/BA28 | 0.042 | <https://neurosynth.org/locations/?x=-20&y=-28&z=-6> |
| 0 | 70 | 4.39 | 6.46 | -21 | -55 | 24 | L Cuneus / L Cingulate Gyrus | 0.001 | <https://neurosynth.org/locations/?x=-20&y=-56&z=24> |
| 0 | 45 | 4.60 | 7.37 | 27 | 11 | 60 | R Prefrontal/motor | 0.011 | <https://neurosynth.org/locations/?x=28&y=12&z=60> |
| 0 | 42 | 4.50 | 7.98 | 42 | -52 | -57 | R Cerebellum VIII | 0.017 | <https://neurosynth.org/locations/?x=42&y=-52&z=-56> |
| 0 | 1092 | 5.36 | 16.56 | 6 | -85 | 3 | R Primary Visual Cortex/BA17 | <.001 | <https://neurosynth.org/locations/?x=6&y=-84&z=4> |
|  |  |  |  |  |  |  |  |  |  |
| 1 | 4453 | 4.55 | -10.14 | 51 | -4 | 36 | R Precentral/BA6 | <.001 | <https://neurosynth.org/locations/?x=52&y=-4&z=36> |
| 1 | 358 | 4.51 | -8.45 | 48 | -73 | 12 | R Middle Temporal Gyrus/BA39 | <.001 | <https://neurosynth.org/locations/?x=48&y=-72&z=12> |
| 1 | 53 | 4.60 | -8.24 | 60 | 2 | -9 | R STG | 0.003 | <https://neurosynth.org/locations/?x=60&y=2&z=-8> |
| 1 | 67 | 4.37 | -7.04 | 33 | 8 | -15 | R IFG/Insular/BA13 | <.001 | <https://neurosynth.org/locations/?x=32&y=8&z=-16> |
| 1 | 34 | 4.47 | -6.10 | -45 | 26 | -12 | L IFG/BA47 | 0.034 | <https://neurosynth.org/locations/?x=-44&y=26&z=-12> |
| 1 | 33 | 3.90 | 4.76 | -3 | -31 | 39 | L PCC/BA31 | 0.039 | <https://neurosynth.org/locations/?x=-4&y=-32&z=40> |
| 1 | 115 | 4.03 | 5.74 | -30 | -58 | -33 | L Cerebellum VI | <.001 | <https://neurosynth.org/locations/?x=-30&y=-58&z=-32> |
| 1 | 53 | 4.17 | 6.14 | 33 | 50 | 3 | R Middle Frontal/BA10 | 0.003 | <https://neurosynth.org/locations/?x=32&y=50&z=4> |
| 1 | 52 | 4.34 | 6.41 | 3 | -49 | -33 | Cerebellum Vermis | 0.003 | <https://neurosynth.org/locations/?x=4&y=-48&z=-32> |
| 1 | 83 | 4.61 | 6.52 | 51 | -73 | 33 | R Posterior STS/Angular Gyrus/BA39 | <.001 | <https://neurosynth.org/locations/?x=52&y=-72&z=32> |
| 1 | 138 | 4.21 | 6.73 | 27 | -64 | -21 | R Cerebellum VI/Declive | <.001 | <https://neurosynth.org/locations/?x=28&y=-64&z=-20> |
| 1 | 56 | 4.48 | 6.81 | -21 | -55 | 24 | L Cuneus/Cingulate Gyrus | 0.002 | <https://neurosynth.org/locations/?x=-20&y=-56&z=24> |
| 1 | 84 | 4.41 | 7.30 | 9 | -67 | 48 | R precuneus/BA7 | <.001 | <https://neurosynth.org/locations/?x=8&y=-68&z=48> |
| 1 | 41 | 4.66 | 7.51 | -33 | -82 | 33 | L Precuneus/Intraparietal/BA19 | 0.012 | <https://neurosynth.org/locations/?x=-32&y=-82&z=32> |
| 1 | 69 | 4.35 | 7.54 | 27 | 11 | 57 | R Superior Frontal / BA6-8 | <.001 | <https://neurosynth.org/locations/?x=28&y=12&z=56> |
| 1 | 83 | 4.48 | 7.73 | 30 | -67 | -48 | R Cerebellum VIII, Crus 2 | <.001 | <https://neurosynth.org/locations/?x=30&y=-68&z=-48> |
| 1 | 104 | 4.36 | 8.46 | 15 | -49 | 21 | R ventral precuneus/Retro splenial | <.001 | <https://neurosynth.org/locations/?x=16&y=-48&z=20> |
| 1 | 705 | 5.45 | 12.58 | 9 | -82 | 6 | Primary Visual Cortex, BA17/Cuneus | <.001 | <https://neurosynth.org/locations/?x=8&y=-82&z=6> |
|  |  |  |  |  |  |  |  |  |  |
| 2 | 208 | 4.88 | -11.53 | -48 | -85 | 3 | L Lateral Occipital/BA19 | <.001 | <https://neurosynth.org/locations/?x=-48&y=-84&z=4> |
| 2 | 5073 | 4.87 | -11.41 | 42 | -28 | 69 | R Postcentral Gyrus | <.001 | <https://neurosynth.org/locations/?x=42&y=-28&z=68> |
| 2 | 373 | 4.42 | -7.93 | 54 | -79 | 6 | R Middle Occipital Gyrus/V5/MT | <.001 | <https://neurosynth.org/locations/?x=54&y=-80&z=6> |
| 2 | 36 | 4.55 | -7.17 | 21 | -10 | -21 | R Parahippocampal Gyrus | 0.014 | <https://neurosynth.org/locations/?x=20&y=-10&z=-20> |
| 2 | 38 | 4.51 | -6.91 | -33 | 8 | -12 | L IFG | 0.01 | <https://neurosynth.org/locations/?x=-32&y=8&z=-12> |
| 2 | 51 | 4.00 | -4.99 | 33 | -94 | 21 | R Middle Occipital Gyrus | 0.002 | <https://neurosynth.org/locations/?x=32&y=-94&z=20> |
| 2 | 31 | 4.05 | 4.80 | -18 | -55 | 24 | L Parieto-occipital Area/Cuneus | 0.032 | <https://neurosynth.org/locations/?x=-18&y=-56&z=24> |
| 2 | 31 | 4.00 | 4.83 | 15 | -16 | 21 | R Caudate Nucleus | 0.032 | <https://neurosynth.org/locations/?x=16&y=-16&z=20> |
| 2 | 35 | 4.08 | 5.02 | -21 | -34 | 18 | L Caudate Tail | 0.017 | <https://neurosynth.org/locations/?x=-20&y=-34&z=18> |
| 2 | 44 | 4.04 | 5.64 | 12 | -52 | 21 | R PCC/BA31 | 0.004 | <https://neurosynth.org/locations/12_-52_18_6/> |
| 2 | 48 | 3.99 | 6.11 | 57 | -46 | 45 | R IPL/BA40 | 0.002 | <https://neurosynth.org/locations/?x=56&y=-46&z=44> |
| 2 | 131 | 4.37 | 6.18 | 42 | -58 | 42 | R IPL/BA40 | <.001 | <https://neurosynth.org/locations/42_-58_42_6/> |
| 2 | 31 | 4.26 | 6.30 | 54 | 20 | 39 | R IFG opercularis | 0.032 | <https://neurosynth.org/locations/?x=54&y=20&z=40> |
| 2 | 66 | 4.21 | 6.39 | -15 | -1 | 18 | L Caudate | <.001 | <https://neurosynth.org/locations/?x=-16&y=0&z=18> |
| 2 | 76 | 4.23 | 6.60 | 33 | 50 | 3 | R Middle Frontal /BA9 | <.001 | <https://neurosynth.org/locations/?x=32&y=50&z=4> |
| 2 | 97 | 4.43 | 6.90 | 18 | 14 | 15 | R Caudate Nucleus | <.001 | <https://neurosynth.org/locations/?x=18&y=14&z=16> |
| 2 | 63 | 4.49 | 6.98 | 12 | -64 | 42 | R Parieto-occipital Sulcus/BA7 | <.001 | <https://neurosynth.org/locations/12_-64_42_6/> |
| 2 | 126 | 4.24 | 7.10 | 24 | 47 | 45 | R SFG/BA8 | <.001 | <https://neurosynth.org/locations/?x=24&y=48&z=44> |
| 2 | 35 | 4.52 | 7.26 | -18 | -40 | -45 | L Cerebellum IX | 0.017 | <https://neurosynth.org/locations/?x=-18&y=-40&z=-44> |
| 2 | 370 | 4.78 | 9.27 | -3 | -88 | 3 | L Cuneus/Primary Visual Cortex | <.001 | <https://neurosynth.org/locations/?x=-4&y=-40&z=-44> |
| 2 | 708 | 4.36 | 11.87 | 18 | -61 | -21 | R Cerebellum VI | <.001 | <https://neurosynth.org/locations/?x=18&y=-60&z=-20> |
|  |  |  |  |  |  |  |  |  |  |

**Table 3.** REST-TASK time-lagged correlation clusters surviving cluster-threshold (k=30, p<0.002, pFWER-clus < 0.05). Clusters in each lag from -2TR to +2TR are shown in separate boxes. For this contrast all surviving clusters are positive and are sorted by their t values, most smaller to larger. Maximum absolute t-value voxel locations (in MNI coordinates) are given in columns X, Y, and Z. To ease finding and viewing cluster locations, a link to “neurosynth” webpage is provided.

| **Lag** | **#Voxels** | **Mean abs (t)** | **Max Int (t)** | **X** | **Y** | **Z** | **Location** | **pFWE-corr** | **Neurosynth** |
| --- | --- | --- | --- | --- | --- | --- | --- | --- | --- |
|  |  |  |  |  |  |  |  |  |  |
| -2 | 76 | 4.253 | 7.64 | 15 | -73 | 15 | Primary Visual Area | <.001 | <https://neurosynth.org/locations/?x=16&y=-72&z=16> |
| -2 | 74 | 4.26 | 5.75 | -6 | -67 | 9 | Primary Visual Cortex/Cuneus/MT Complex | <.001 | <https://neurosynth.org/locations/?x=-6&y=-68&z=8> |
|  |  |  |  |  |  |  |  |  |  |
| -1 | 245 | 4.26 | 7.26 | 15 | -91 | 18 | R Secondary Visual Area | <.001 | <https://neurosynth.org/locations/?x=16&y=-92&z=18> |
| -1 | 72 | 3.97 | 7.24 | 15 | -73 | 15 | R Primary Visual Area | 0.001 | <https://neurosynth.org/locations/?x=16&y=-72&z=16> |
|  |  |  |  |  |  |  |  |  |  |
| 0 | 235 | 4.31 | 6.92 | 6 | -85 | 3 | R Primary Visual / BA 17 | <.001 | <https://neurosynth.org/locations/?x=6&y=-84&z=4> |
| 0 | 57 | 4.06 | 5.51 | 12 | -52 | 12 | R parieto-occipital sulcus/ Precuneus | 0.003 | <https://neurosynth.org/locations/12_-52_12_6/> |
|  |  |  |  |  |  |  |  |  |  |
| 1 | 137 | 4.30 | 6.26 | 0 | -79 | -3 | Primary Visual Cortex | <.001 | <https://neurosynth.org/locations/?x=0&y=-80&z=-4> |
| 1 | 39 | 3.98 | 5.00 | 18 | -55 | 15 | R ventral precuneus | 0.017 | <https://neurosynth.org/locations/?x=18&y=-56&z=16> |
|  |  |  |  |  |  |  |  |  |  |
| 2 | NA | NA | NA | NA | NA | NA | NA | NA |  |
