# Supplementary material for: Blink Synchronized Brain Activation: Association With Ascending Arousal Network
Source: Research Square preprint supplement (doi:10.21203/rs.3.rs-93881/v1), 2020-10-28

**Supplementary Data 3**

**Cluster corrected blink correlations for Rest-Task contrast**

Voxels above or below absolute t-value of 3.54 are shown. Cluster corrected voxels are marked with a thick borderline.

REST-TASK 2TRs before blink


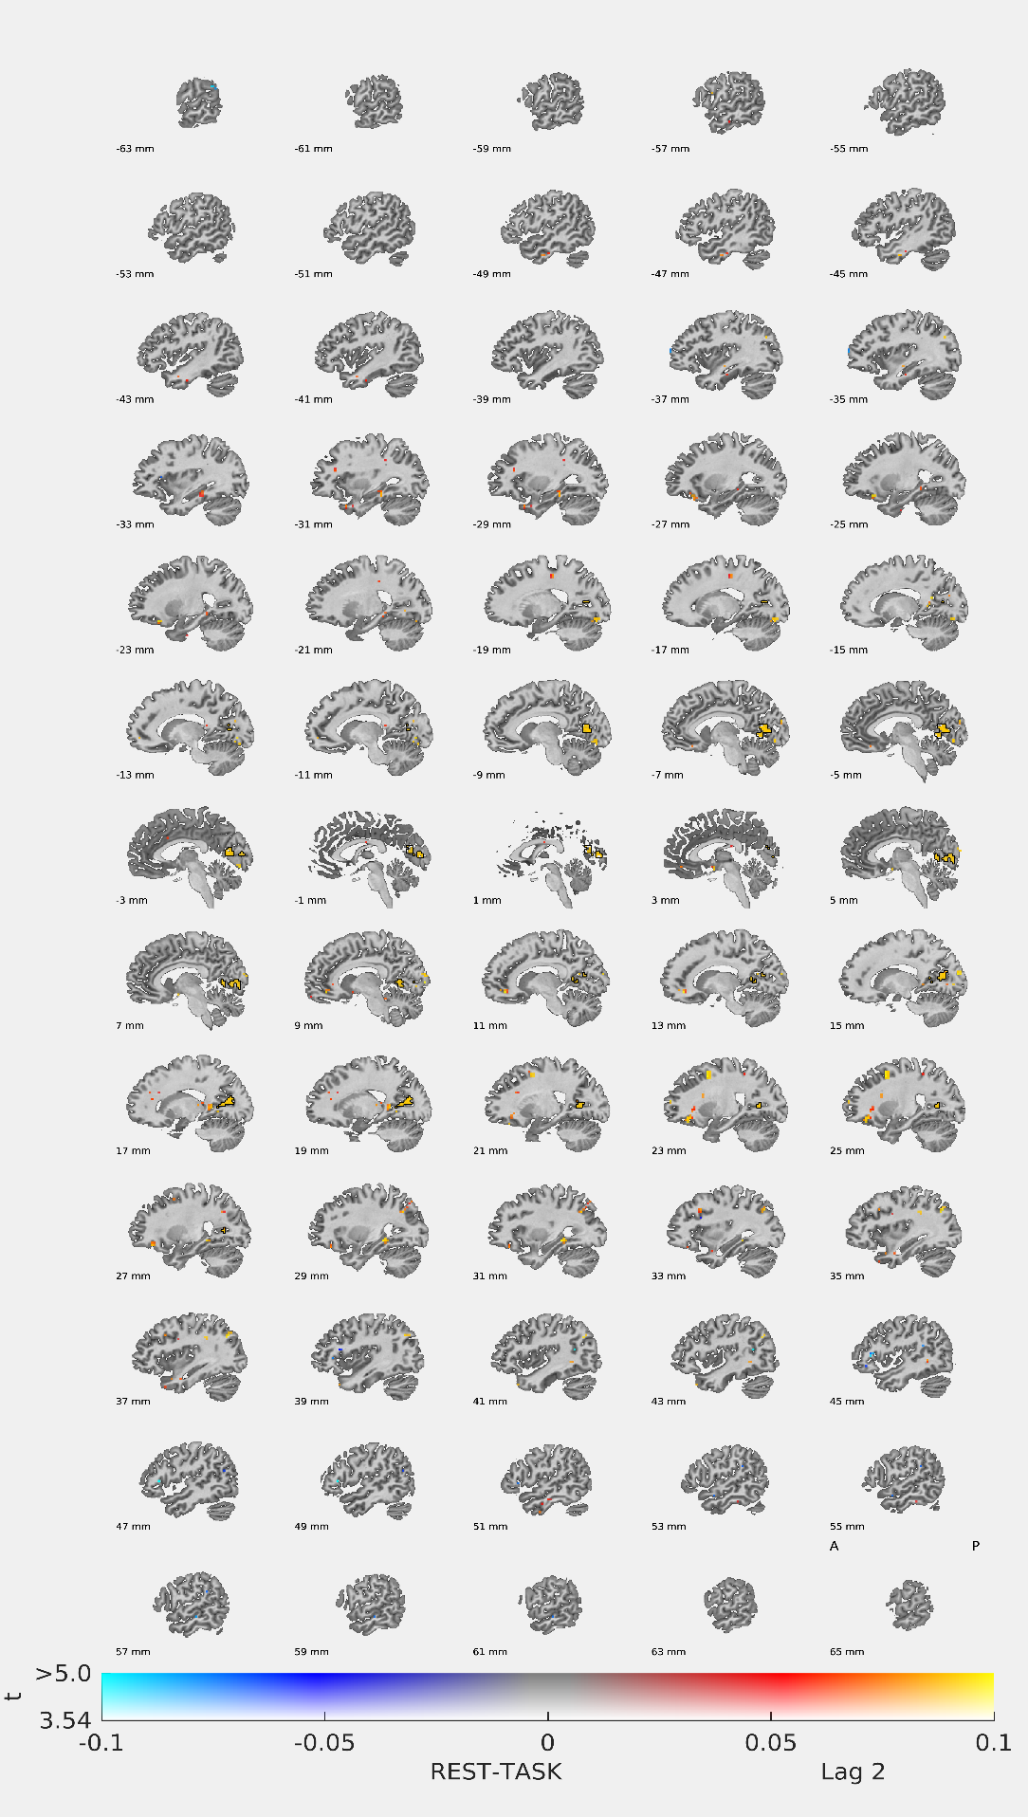

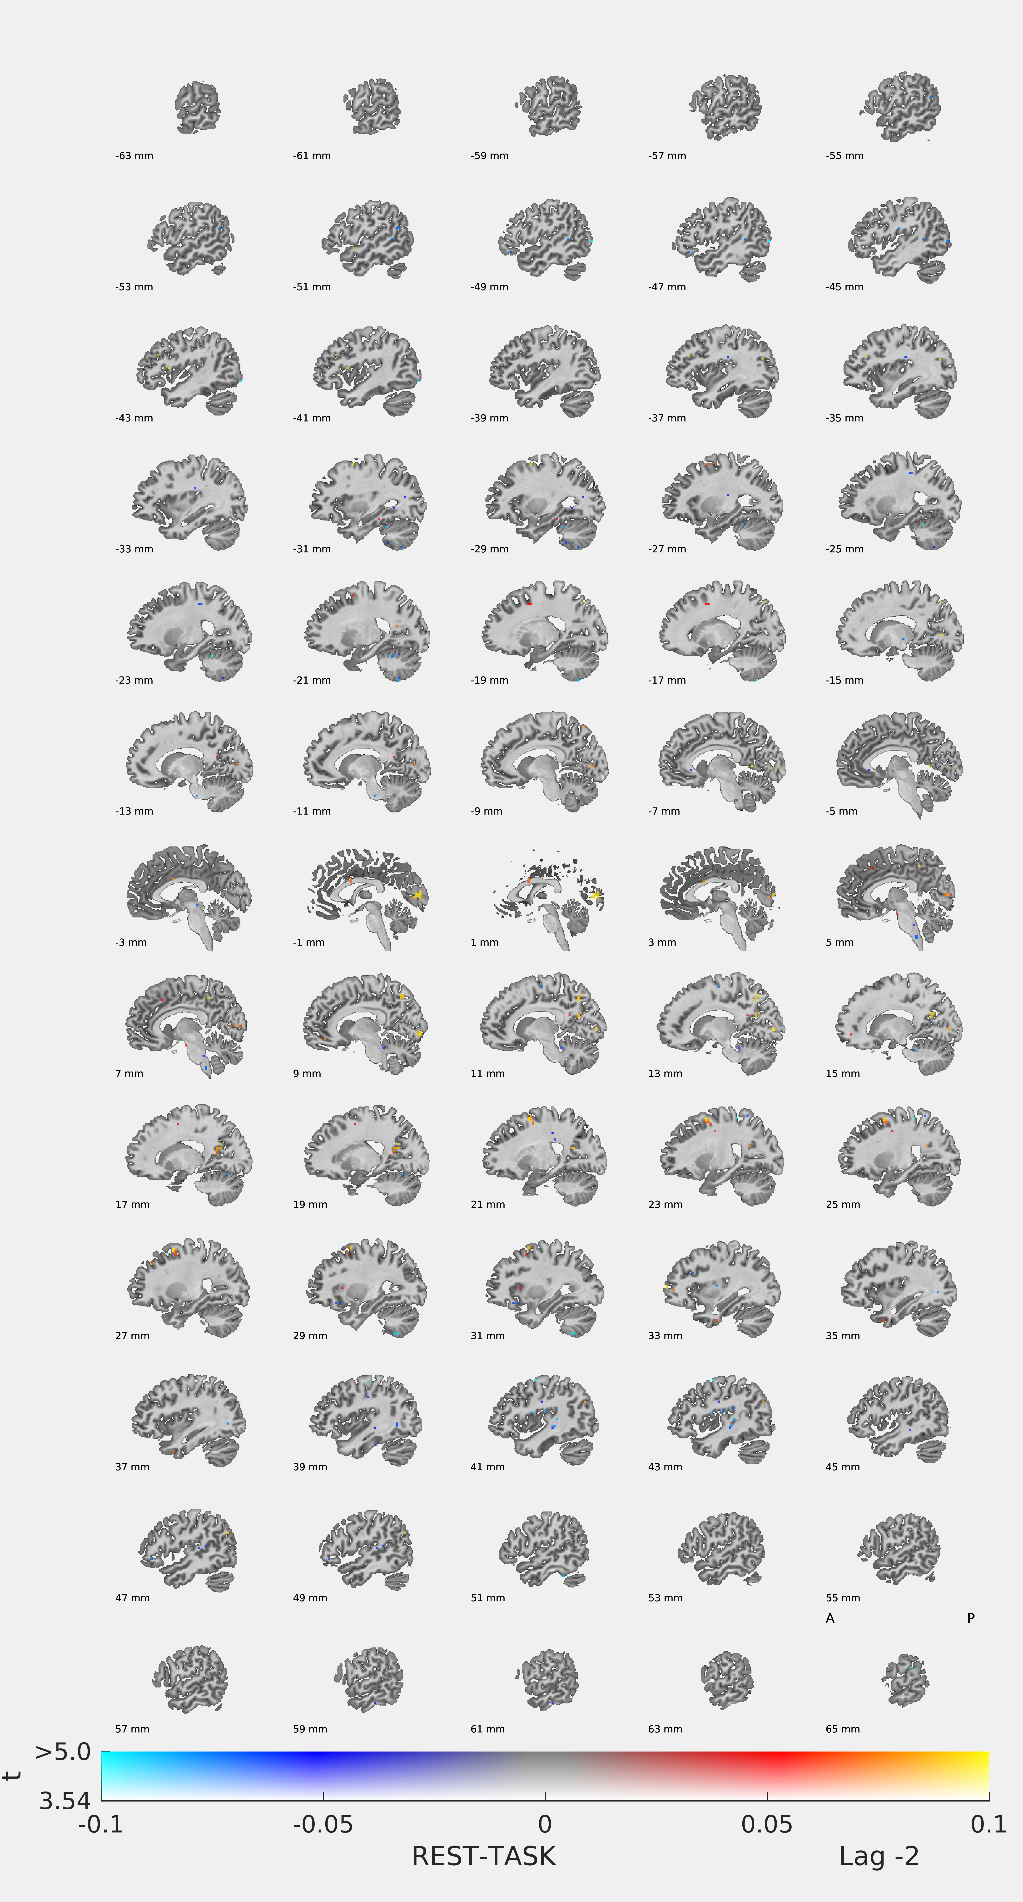


REST-TASK 1TR before blink


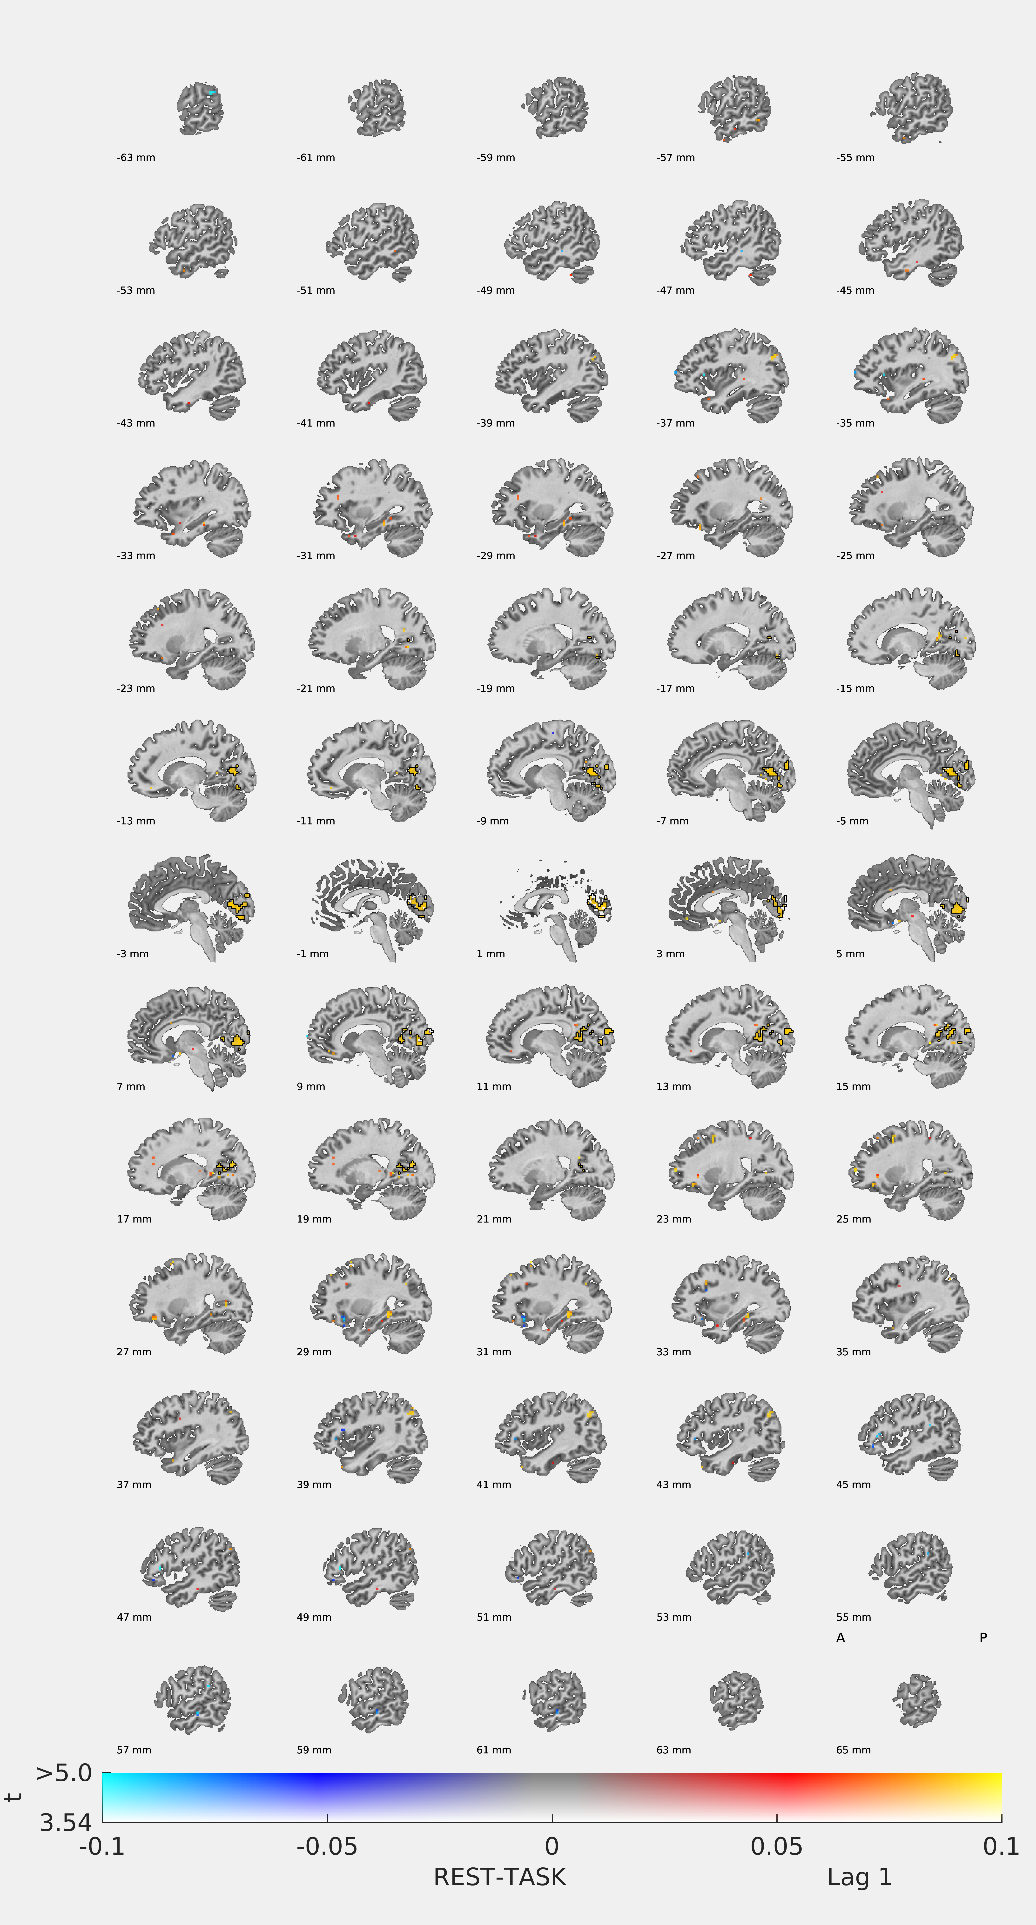

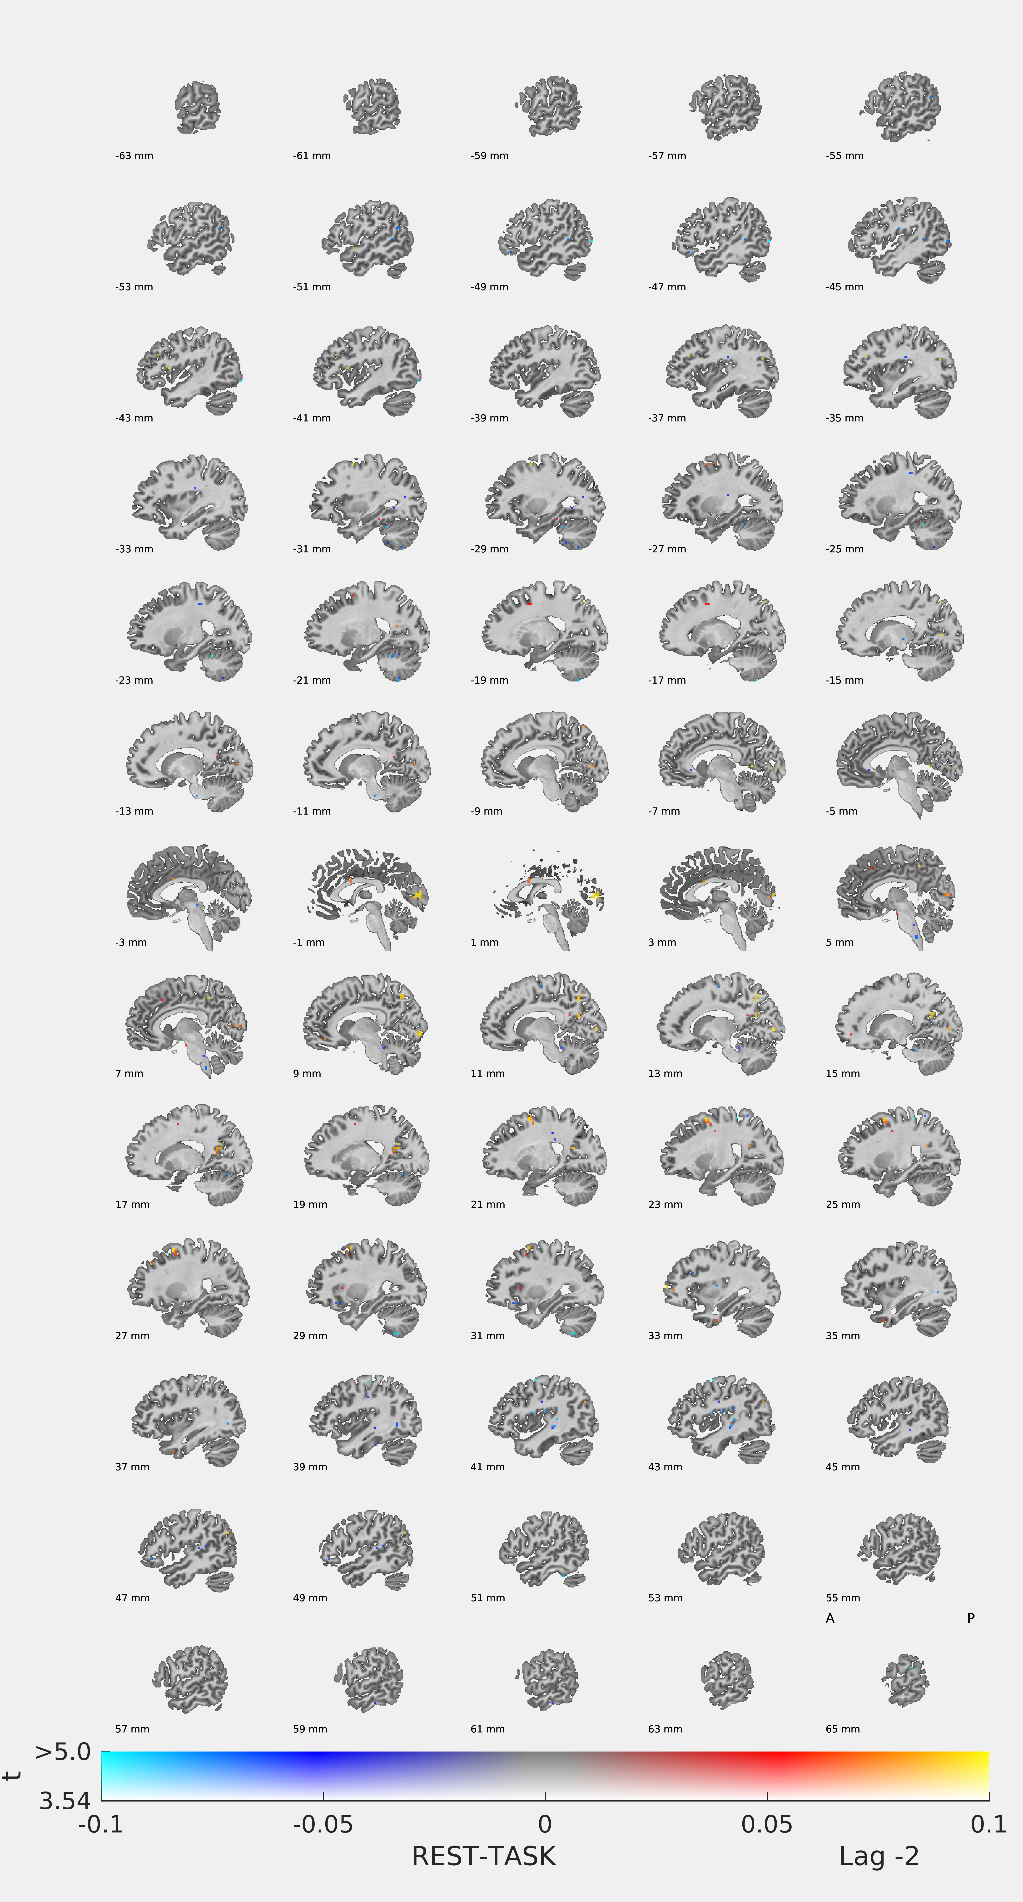


REST-TASK at BLINK


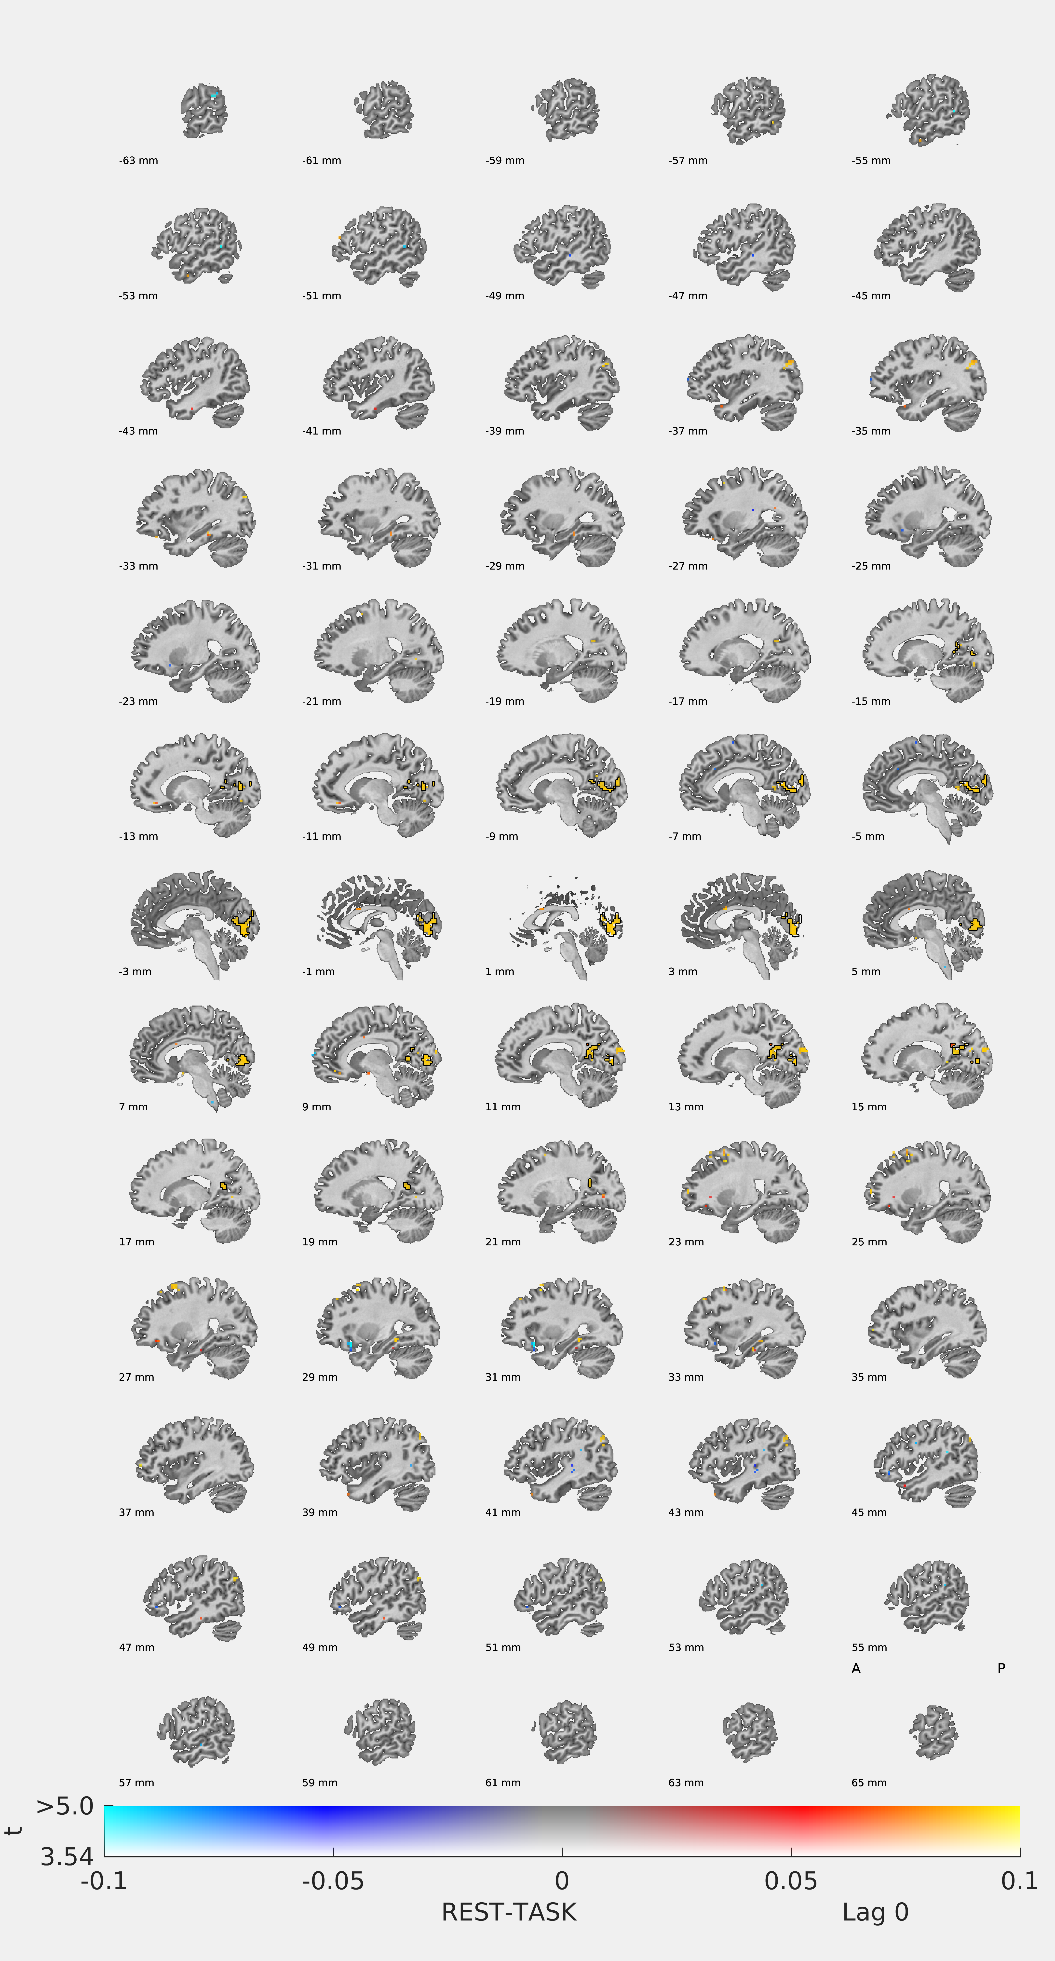

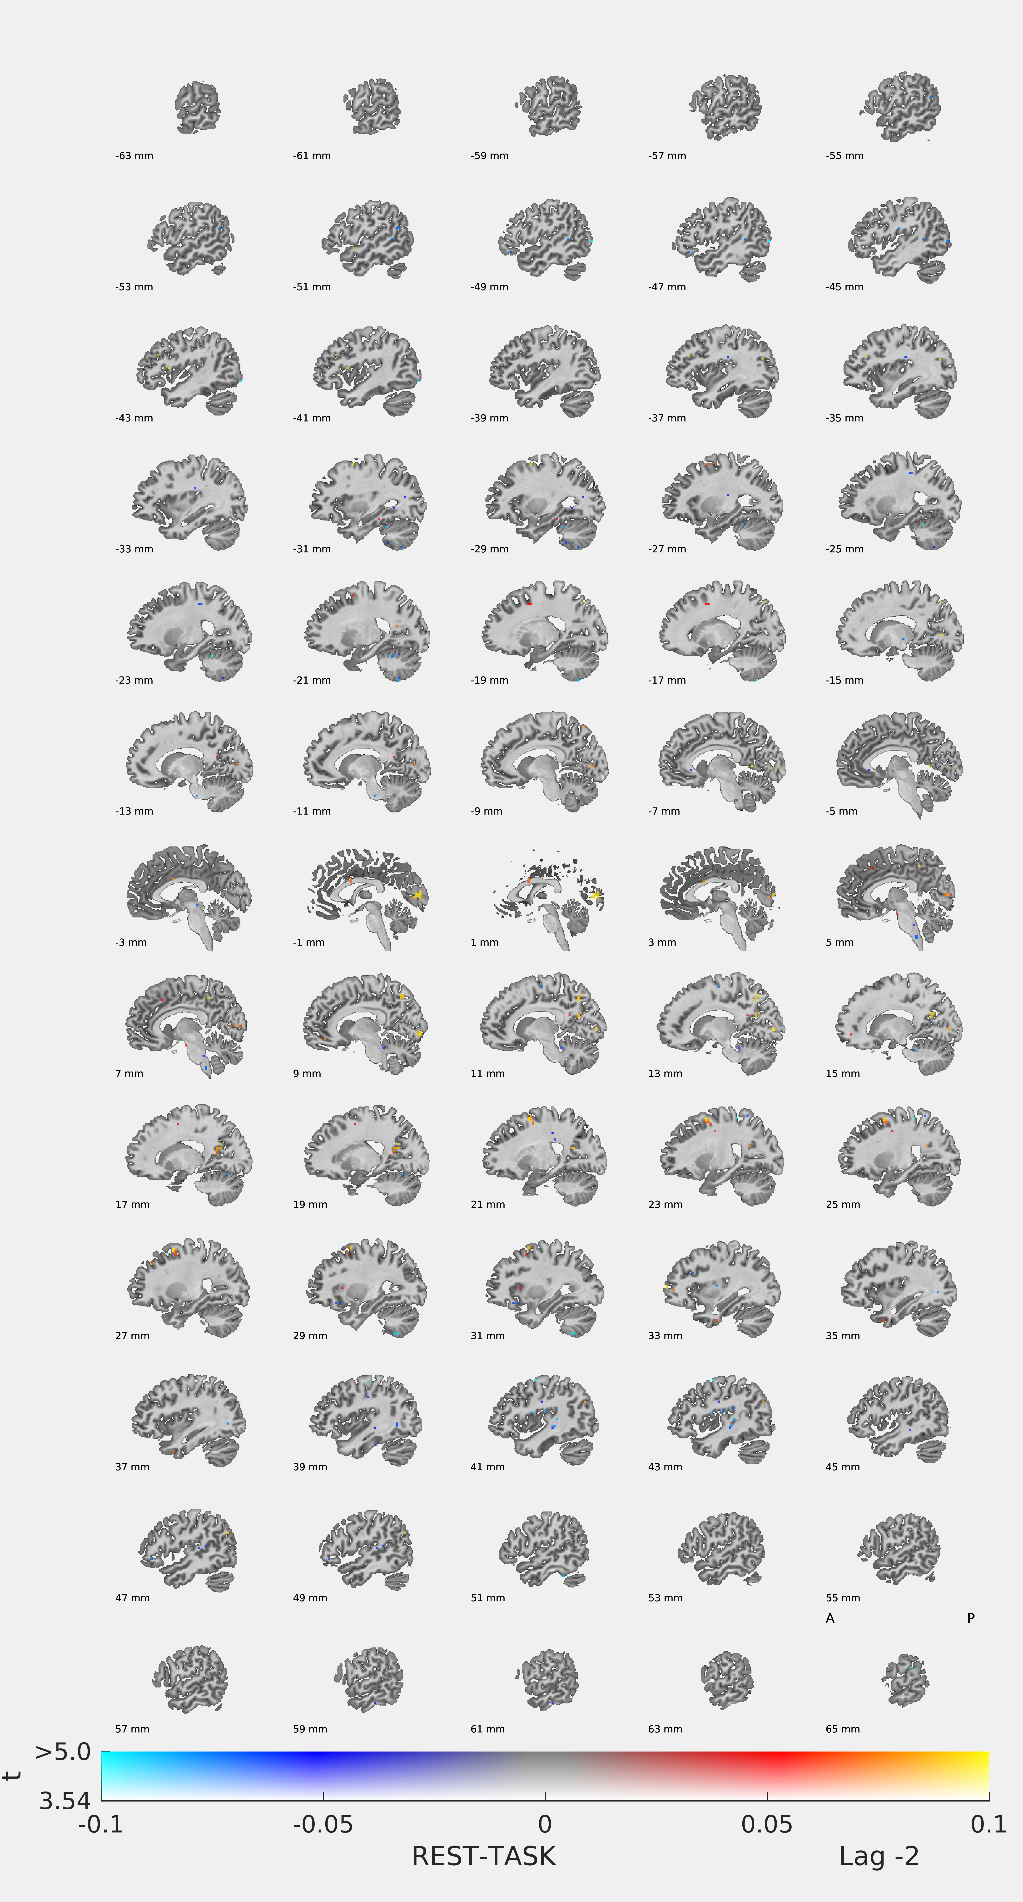


REST-TASK 1TR after blink


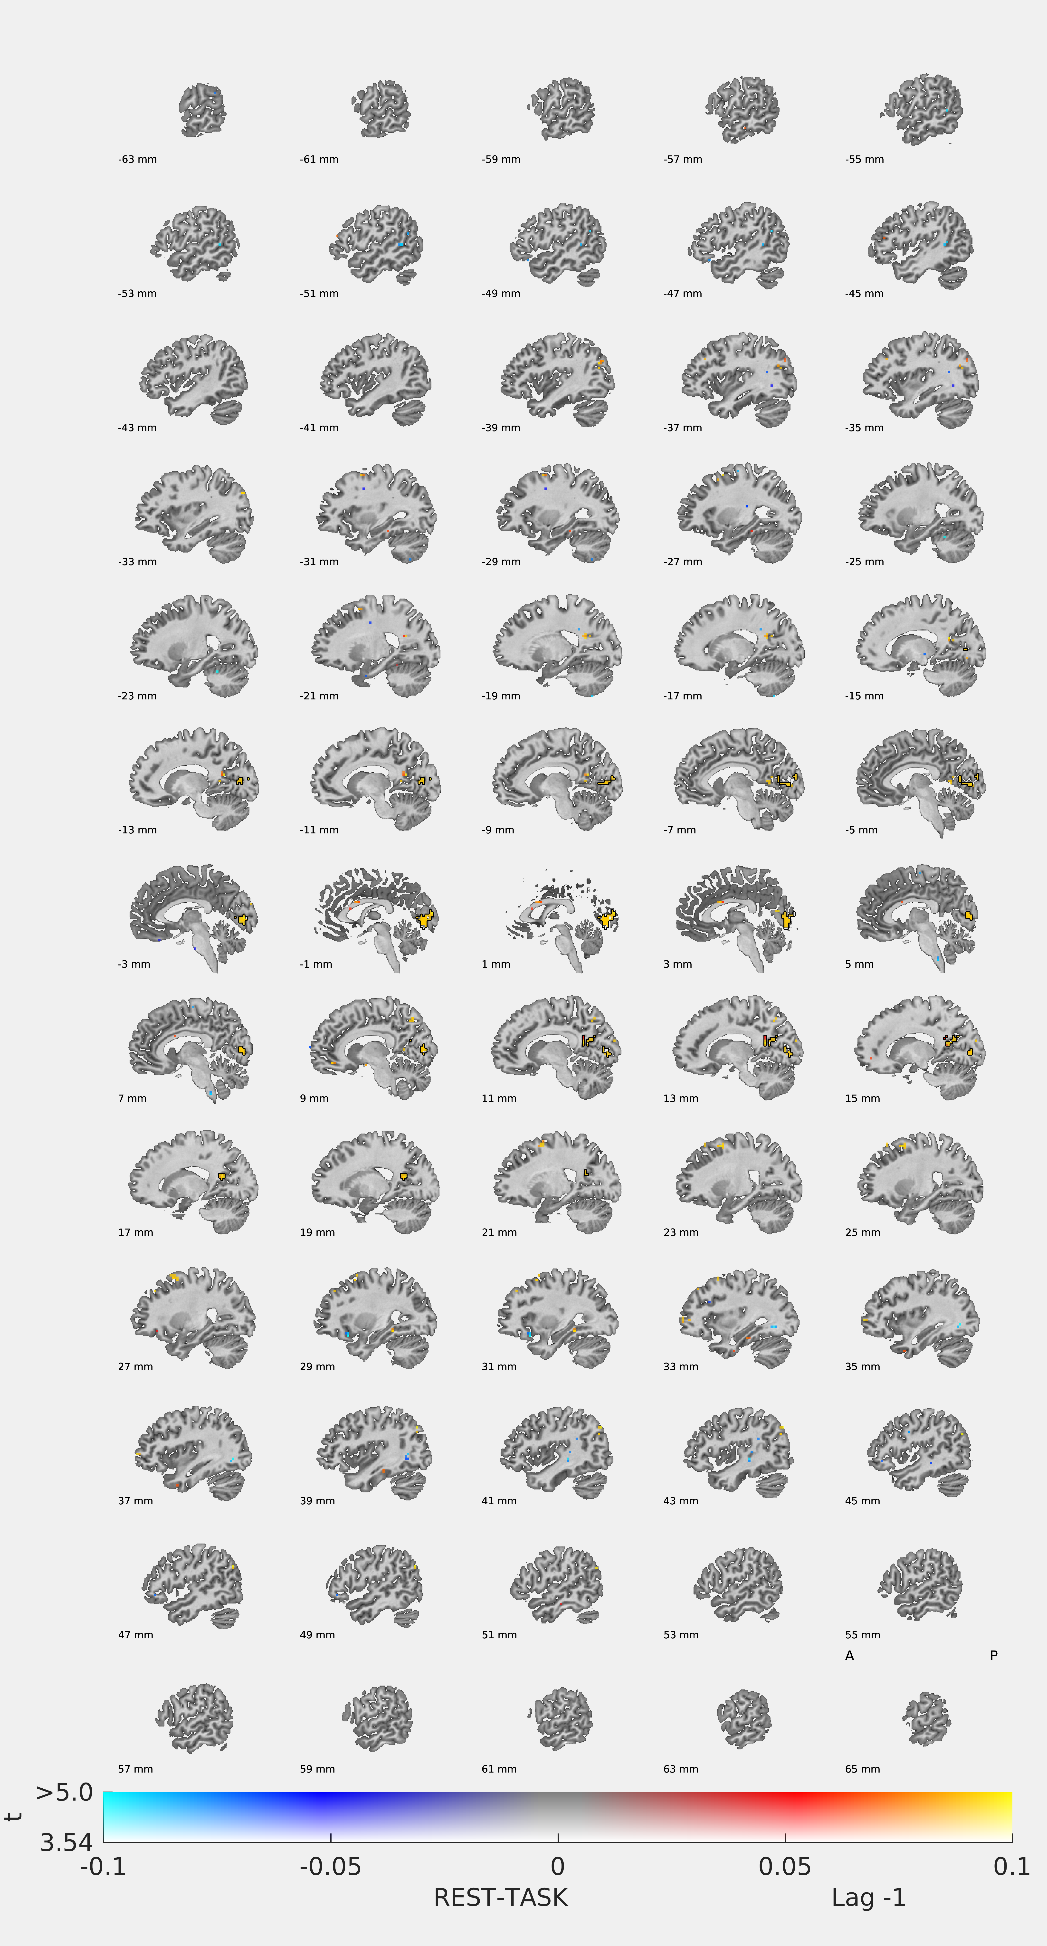

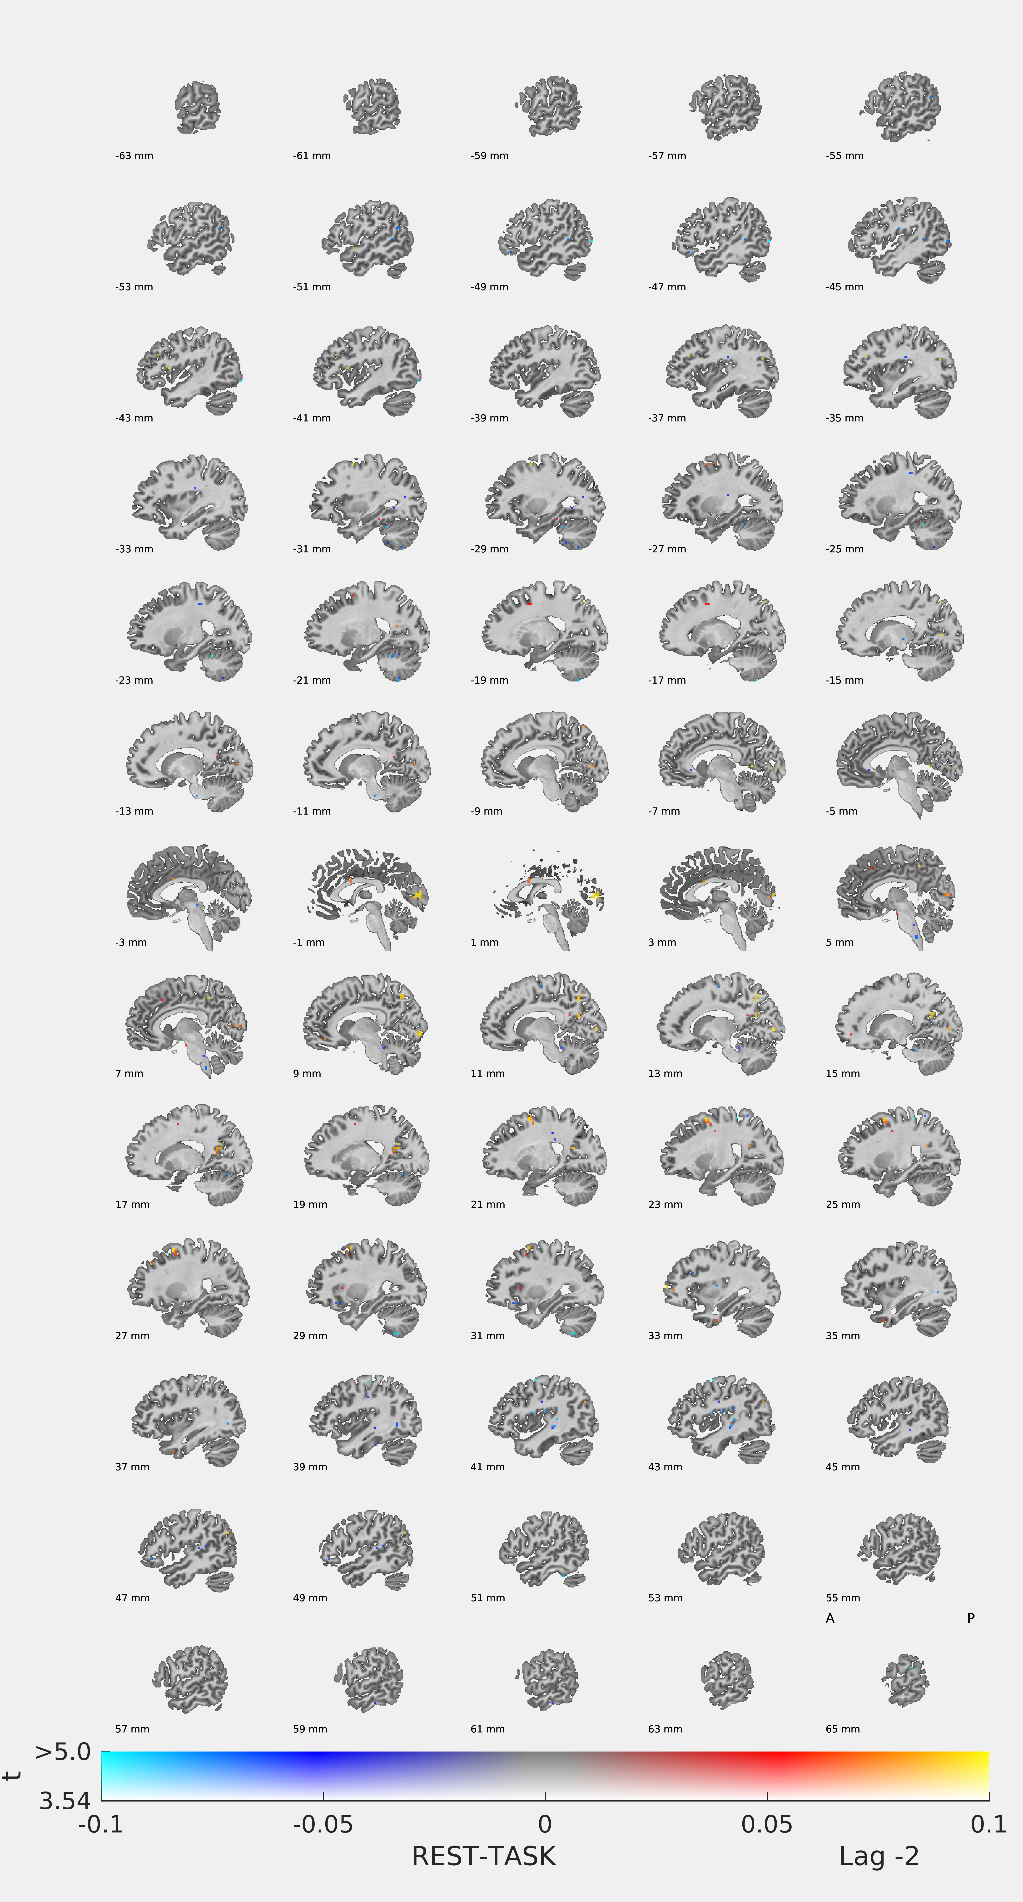


REST-TASK 2TRs after blink


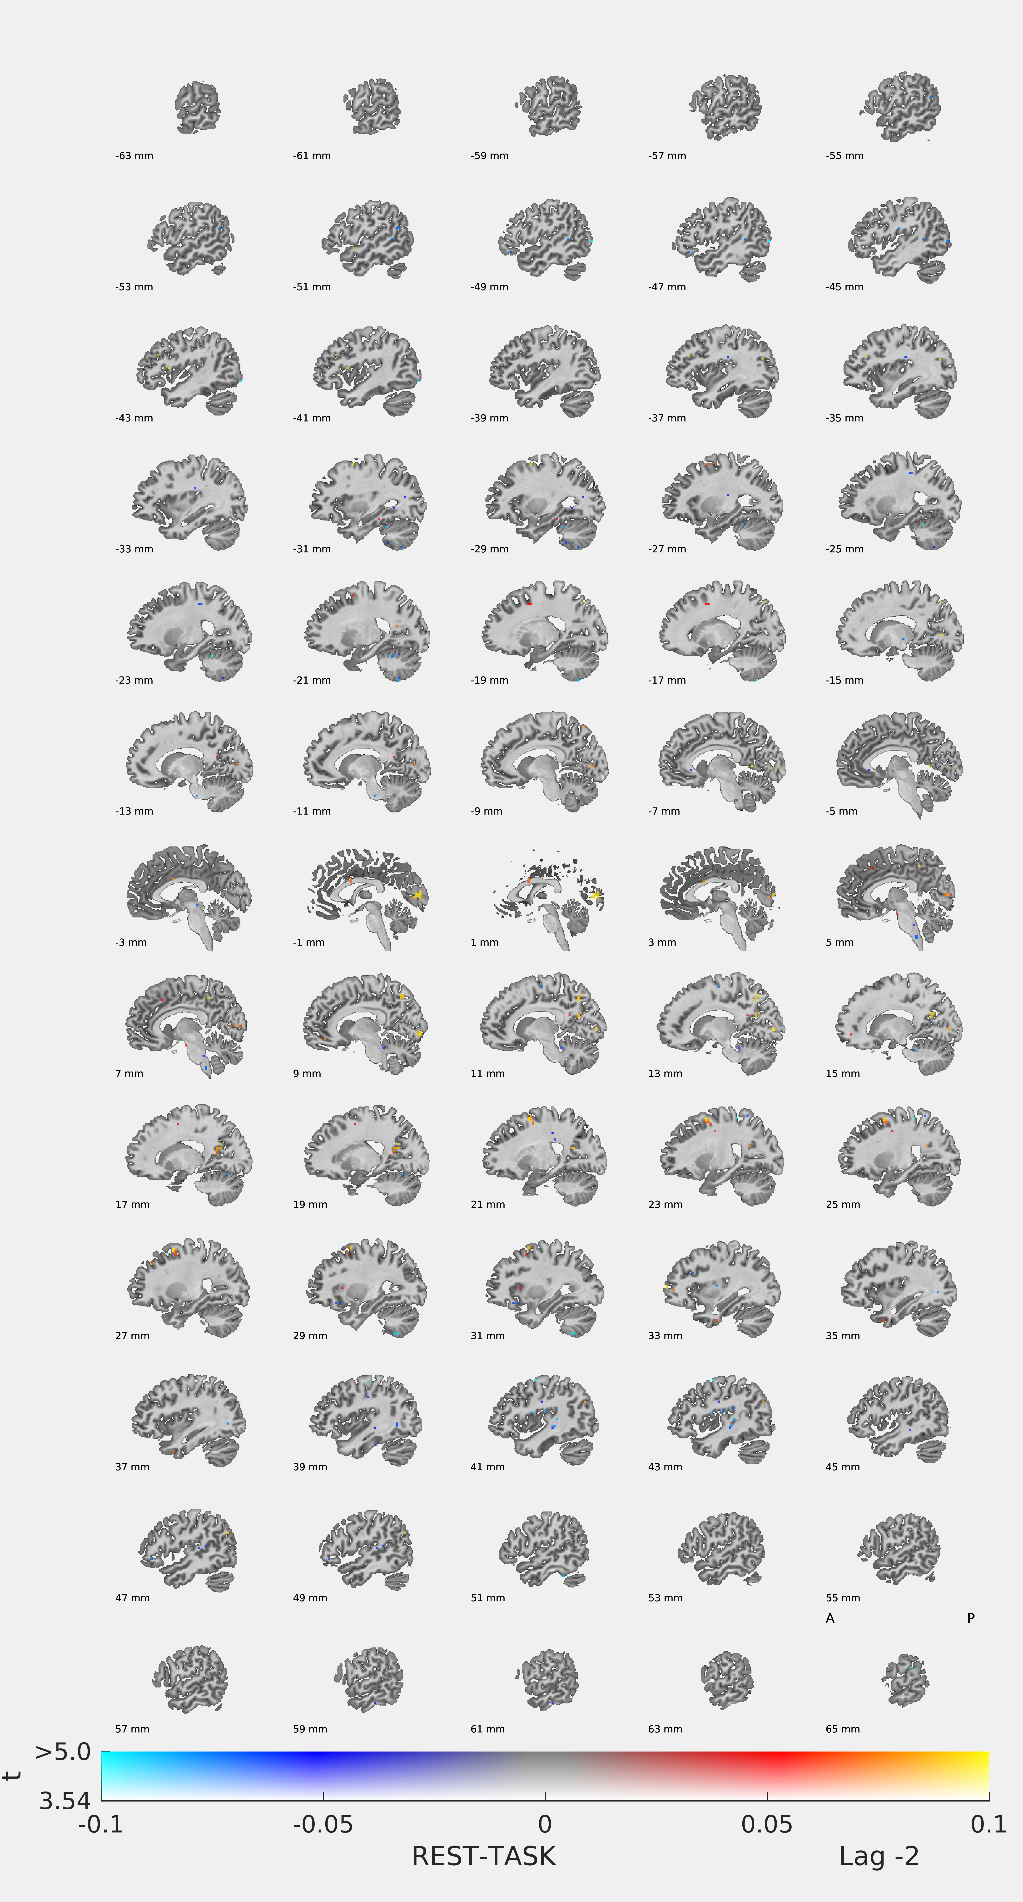

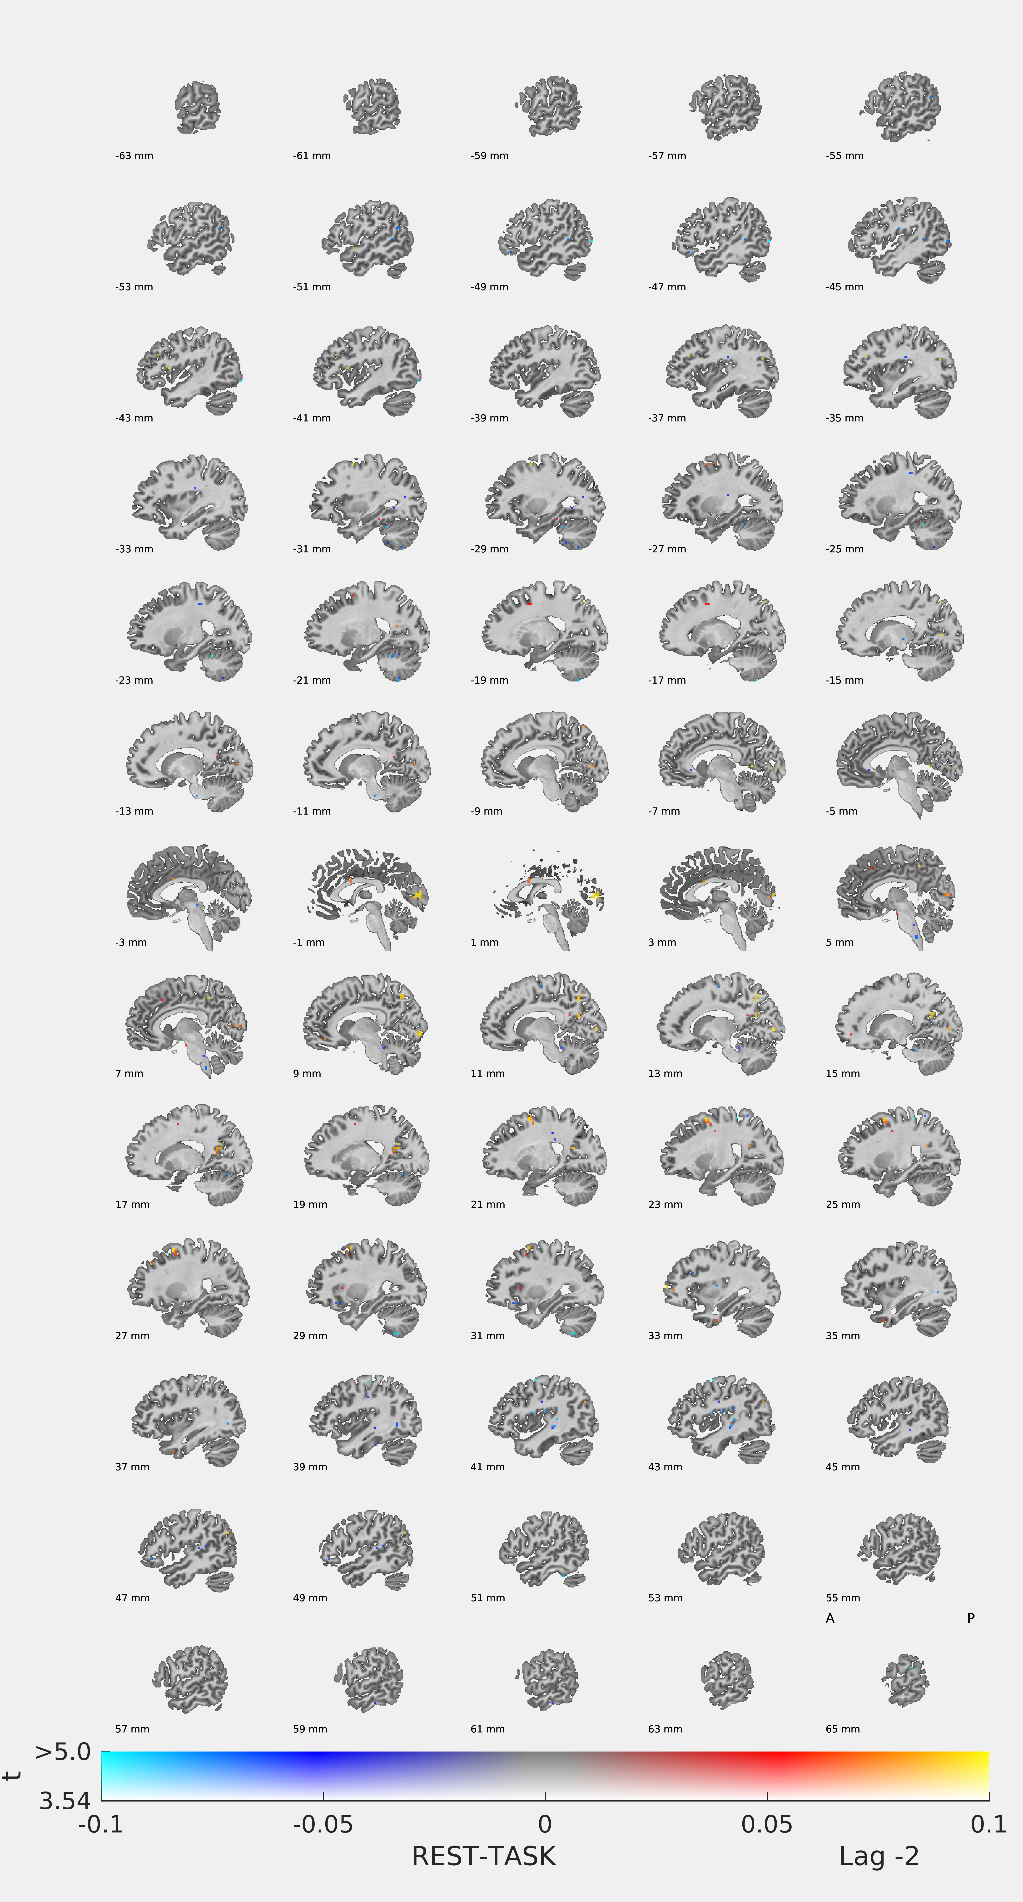

Supplement: Supplementary file 14 [file d6e1436314705ff599fca4f1.docx]
