# Supplementary figures and images for: Blink Synchronized Brain Activation: Association With Ascending Arousal Network
Source: Research Square preprint supplement (doi:10.21203/rs.3.rs-93881/v1), 2020-10-28

**Supplementary Data 6**

VTA ROI response.

ROI centered at MNI xyz: 0,-15,12


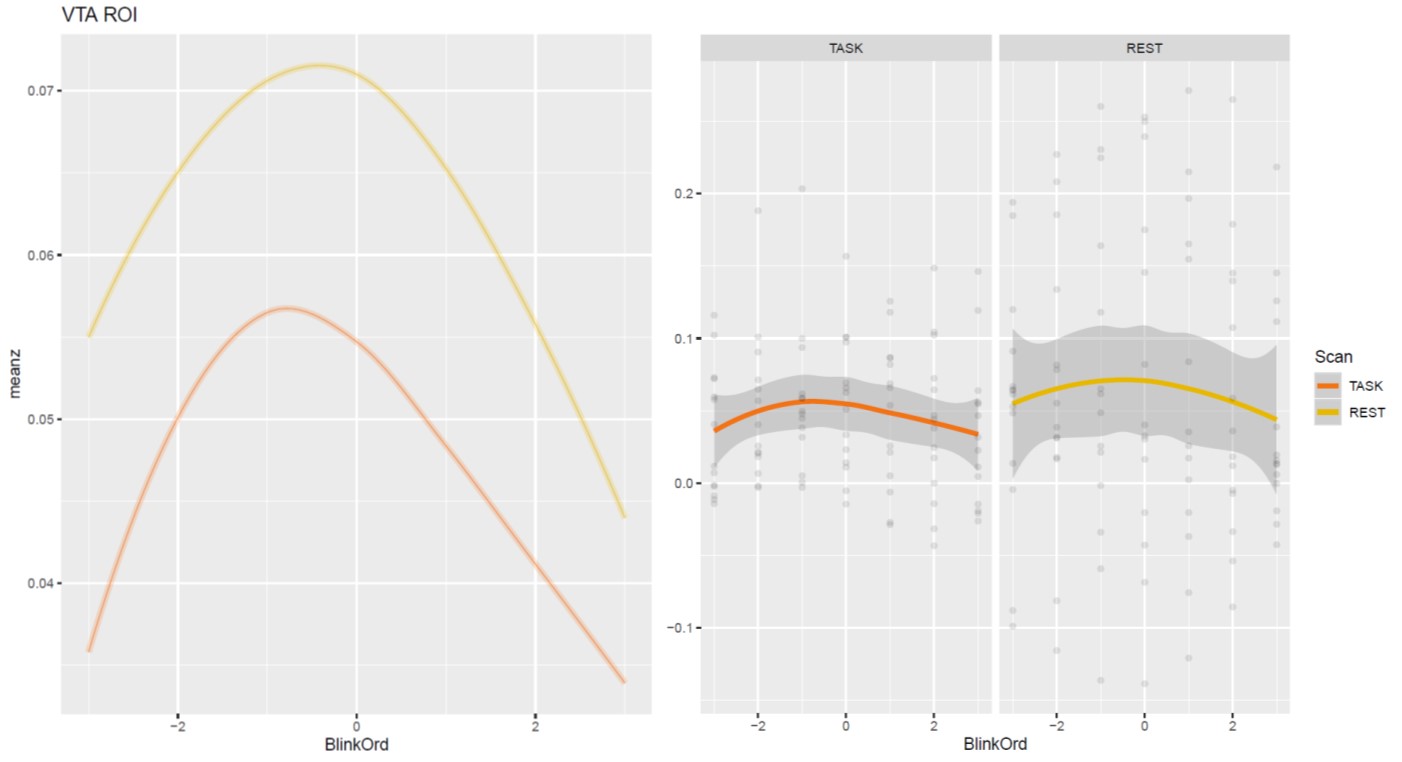

Supplement: Supplementary file 3 [file 3fd40127fa99cc56ba4ec517.docx]
